# Supplementary material for: Synthesis of pyrazole derivatives in the presence of a dioxomolybdenum complex supported on silica-coated magnetite nanoparticles as an efficient and easily recyclable catalyst
Source: Royal Society of Chemistry journal article supplement (doi:10.1039/c6ra20988b), 2016-01-01
Supplement: c6ra20988b1.pdf [file c6ra20988b1.pdf]

## **Supplementary Information**

**for**

# **Synthesis of pyrazole derivatives in the presence of dioxomolybdenum complex supported on silica-coated magnetite nanoparticles as an efficient and easily recyclable catalyst**

Jamshid Rakhshah, Sadegh Salehzadeh\*, Ehsan Gowdini, Farahnaz Maleki, Saeed Baghery and Mohammad Ali Zolfigol

Faculty of Chemistry, Bu-Ali Sina University, Hamedan 6517838683, Iran

Analyst  
Date

Azam Ranjbaran  
Wednesday, February 17, 2016 11:45 AM

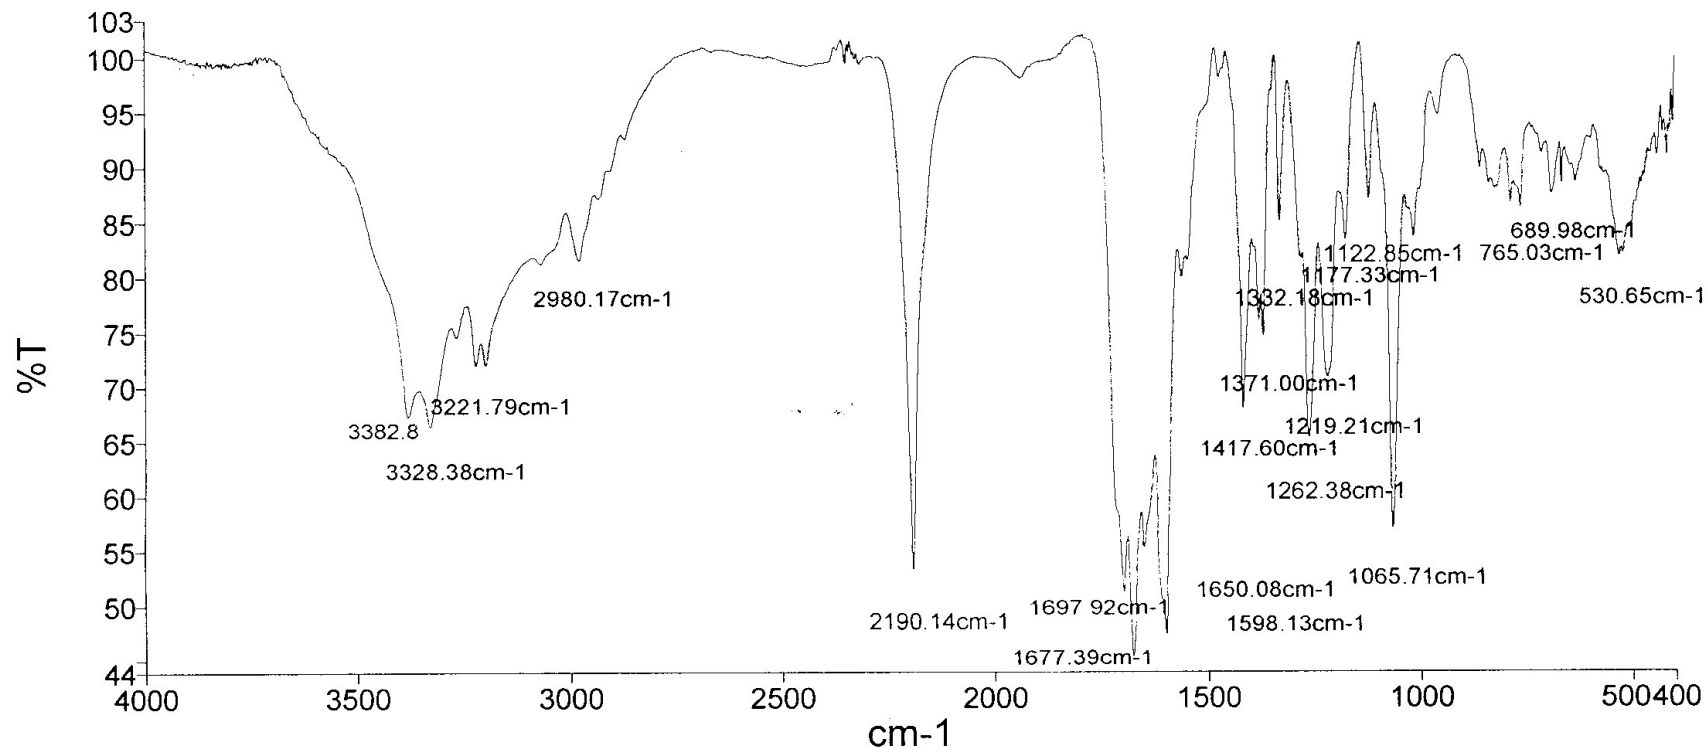

**Fig S1.** The IR of 5-amino-3-(perfluorophenyl)-1-phenyl-1H-pyrazole-4-carbonitrile (Table 3, entry 5)

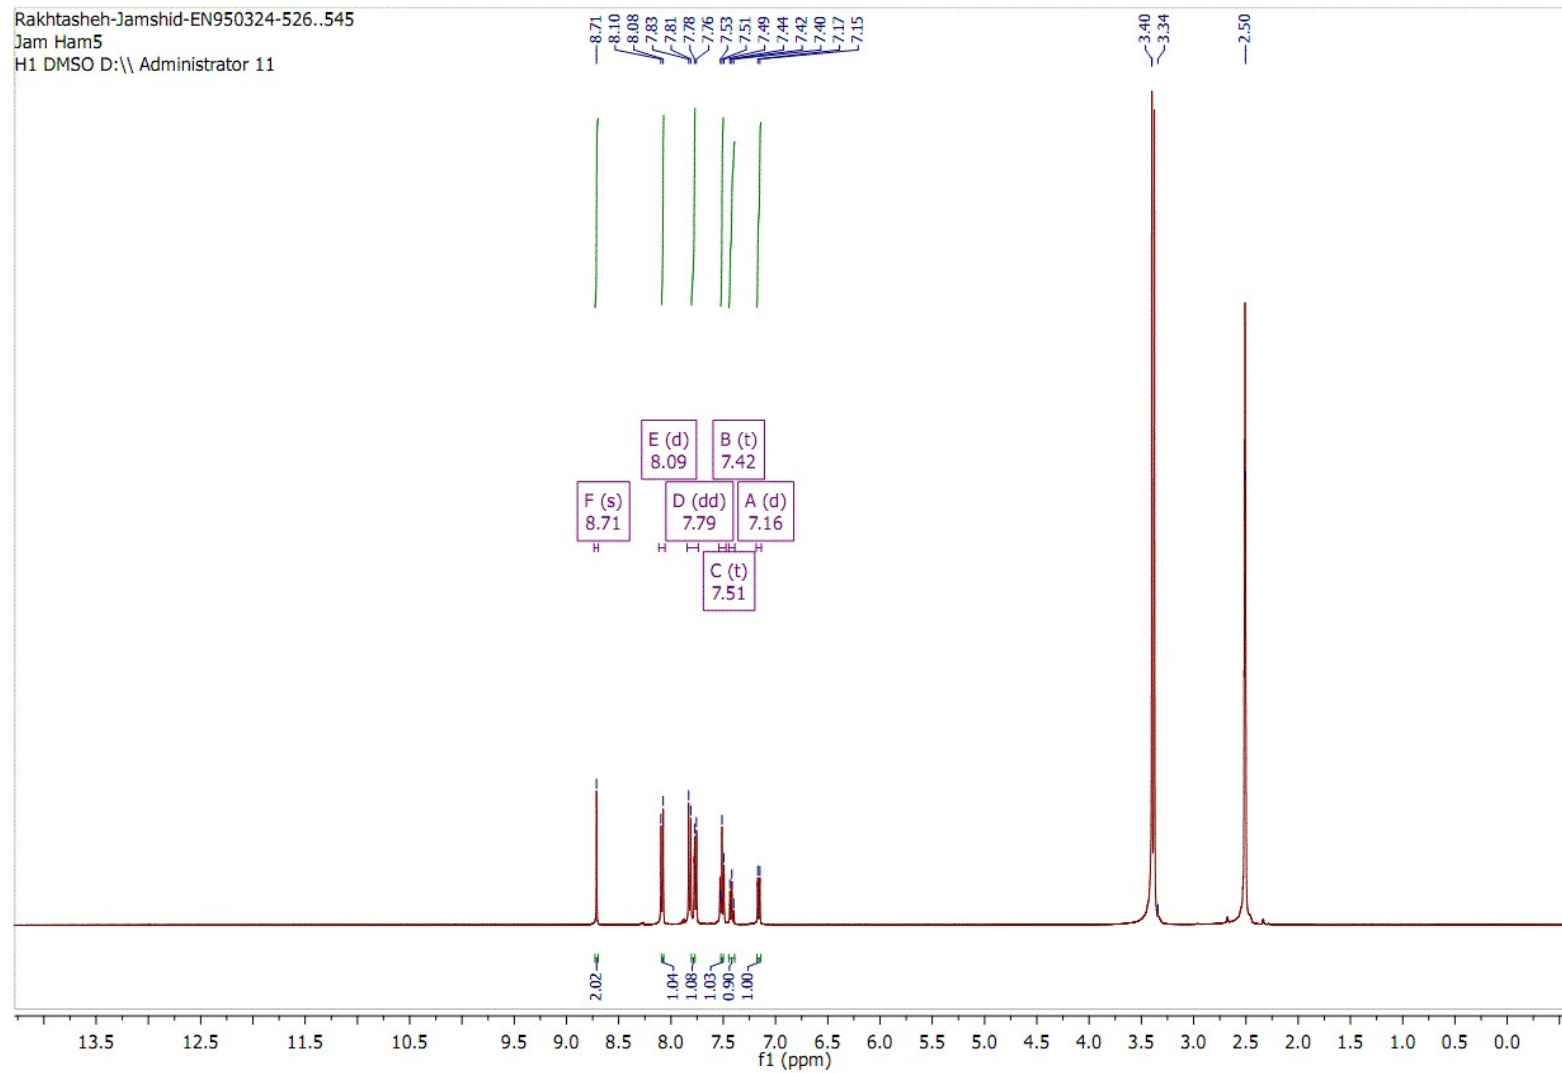

**Fig S2.** The  $^1\text{H}$  NMR of 5-amino-3-(perfluorophenyl)-1-phenyl-1H-pyrazole-4-carbonitrile (Table 3, entry 5)

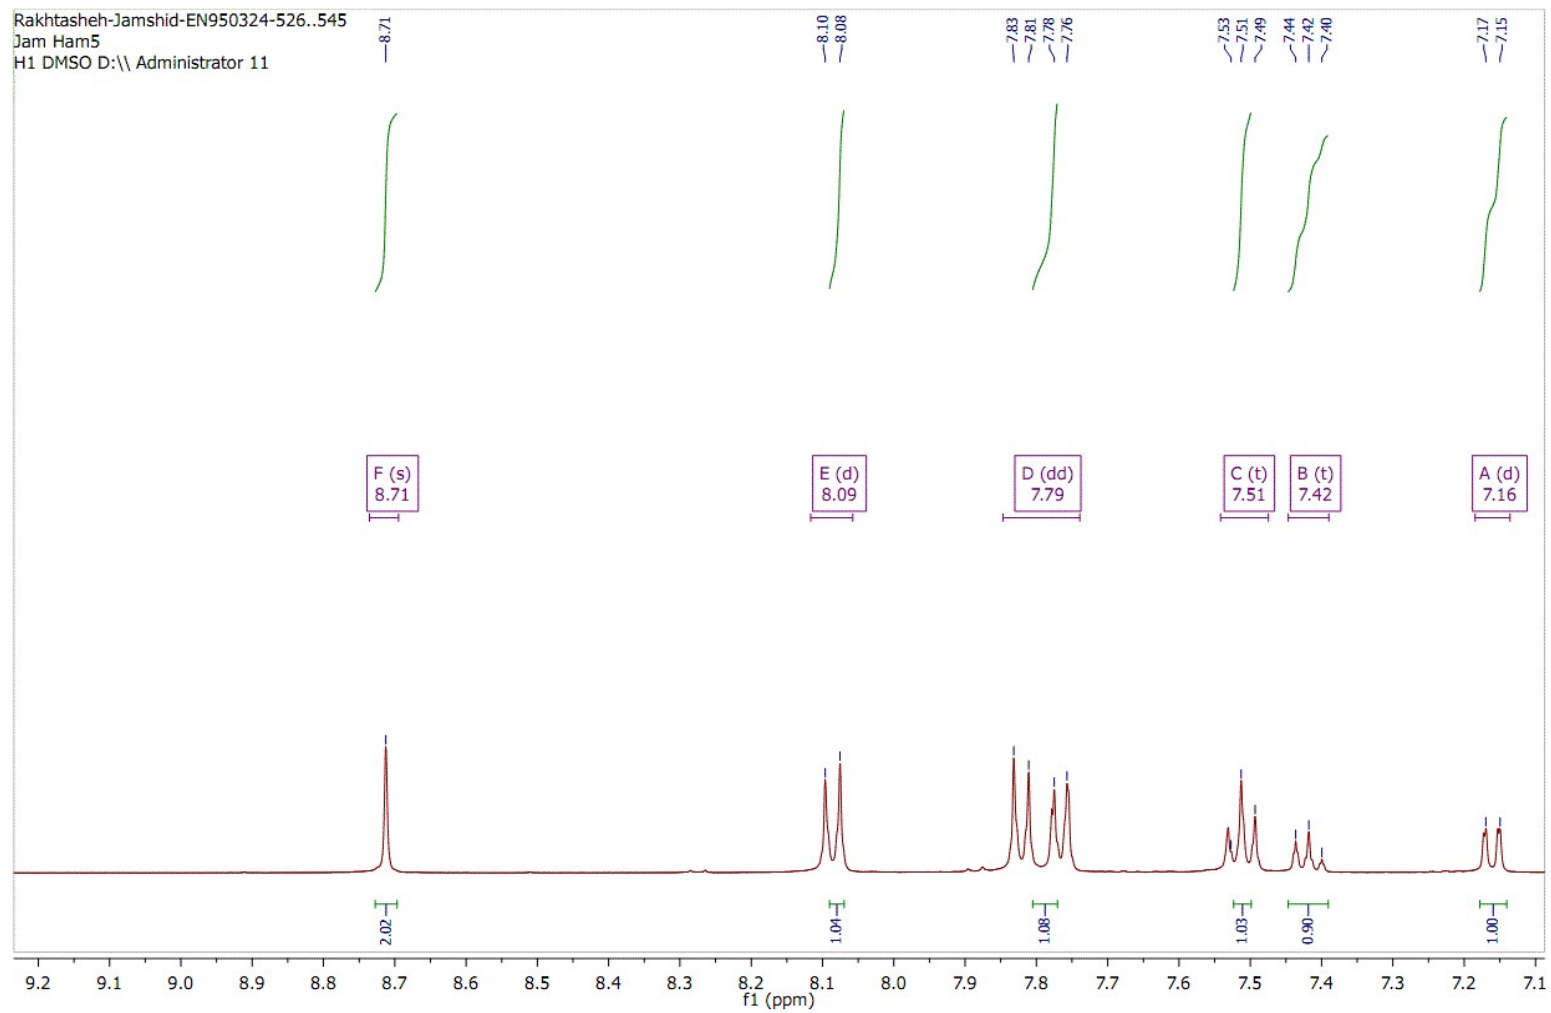

**Fig S3.** The expanded  $^1\text{H}$  NMR of 5-amino-3-(perfluorophenyl)-1-phenyl-1H-pyrazole-4-carbonitrile (Table 3, entry 5)

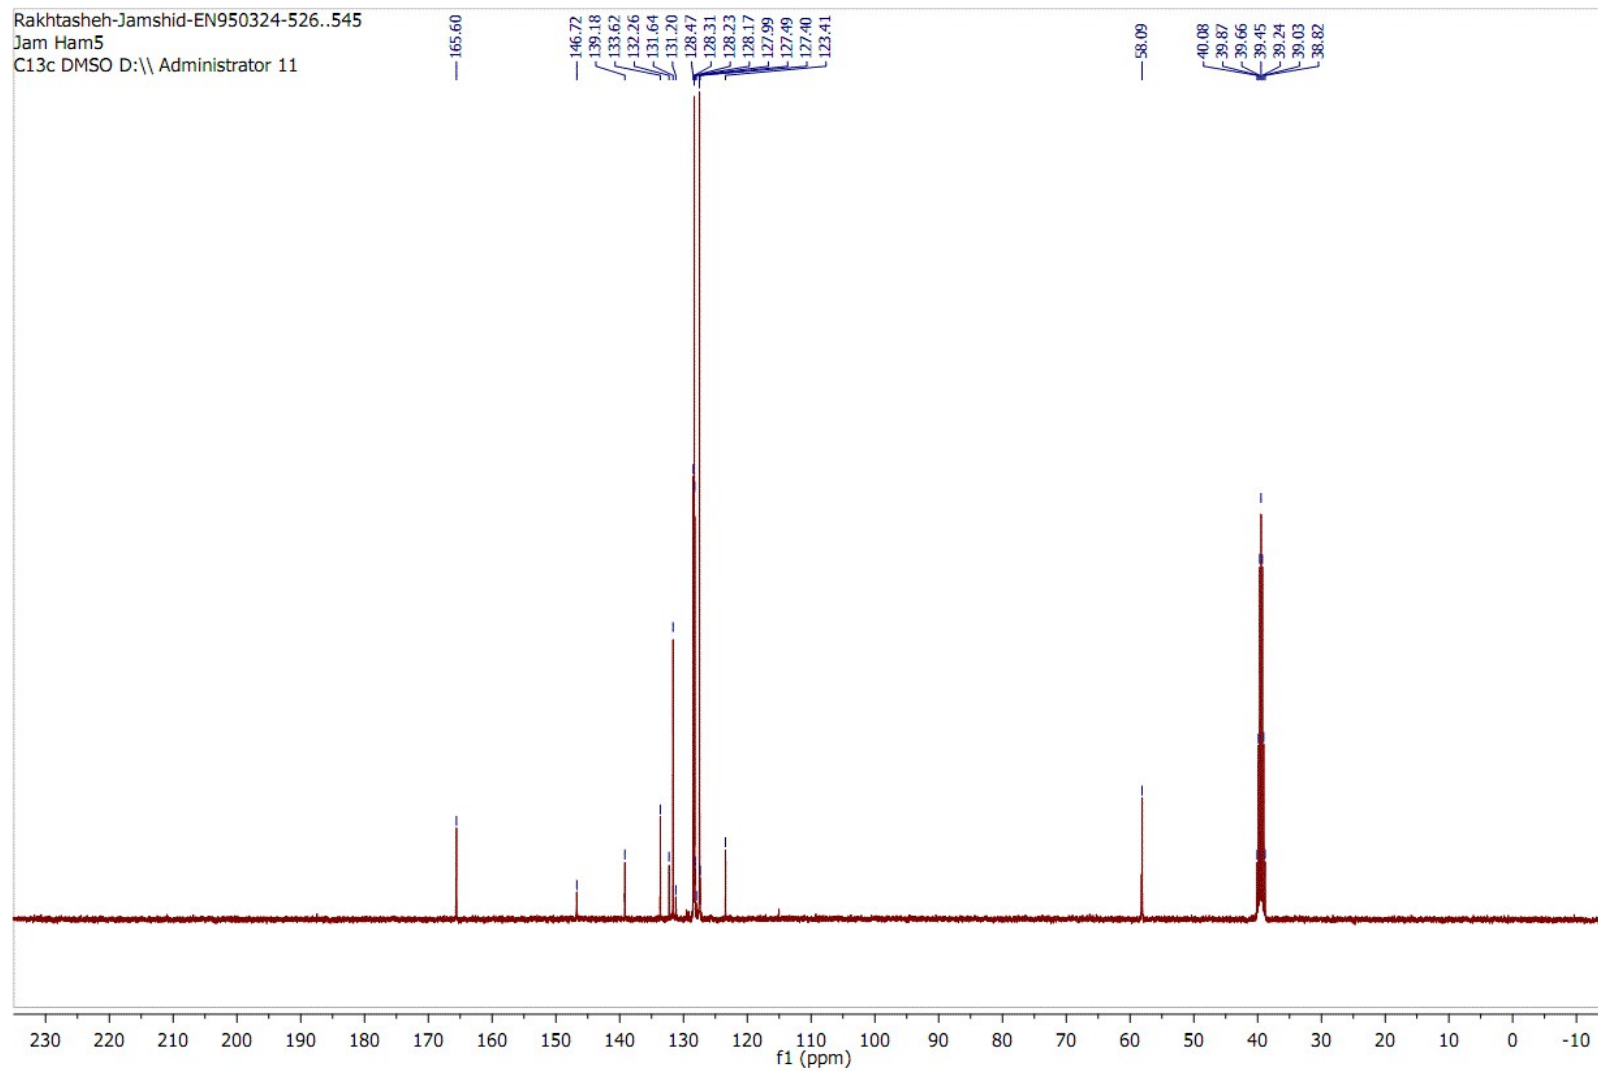

**Fig S4.** The  $^{13}\text{C}$  NMR of 5-amino-3-(perfluorophenyl)-1-phenyl-1H-pyrazole-4-carbonitrile (Table 3, entry 5)

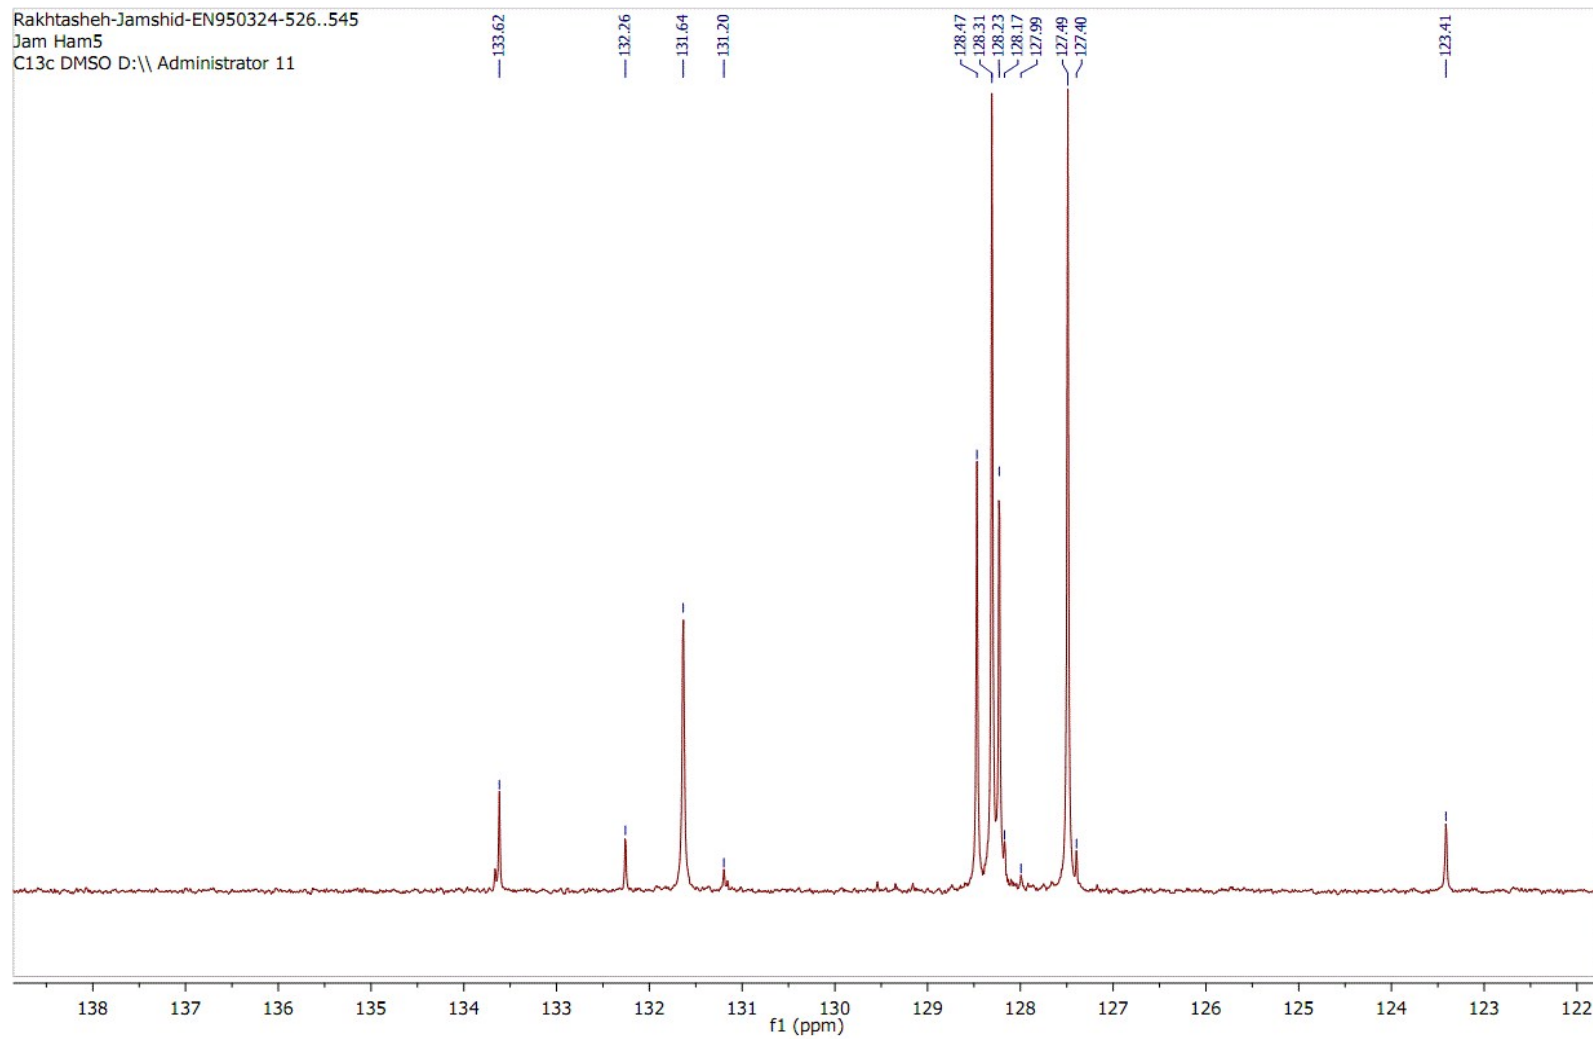

**Fig S5.** The expanded  $^{13}\text{C}$  NMR of 5-amino-3-(perfluorophenyl)-1-phenyl-1H-pyrazole-4-carbonitrile (Table 3, entry 5)

Abundance

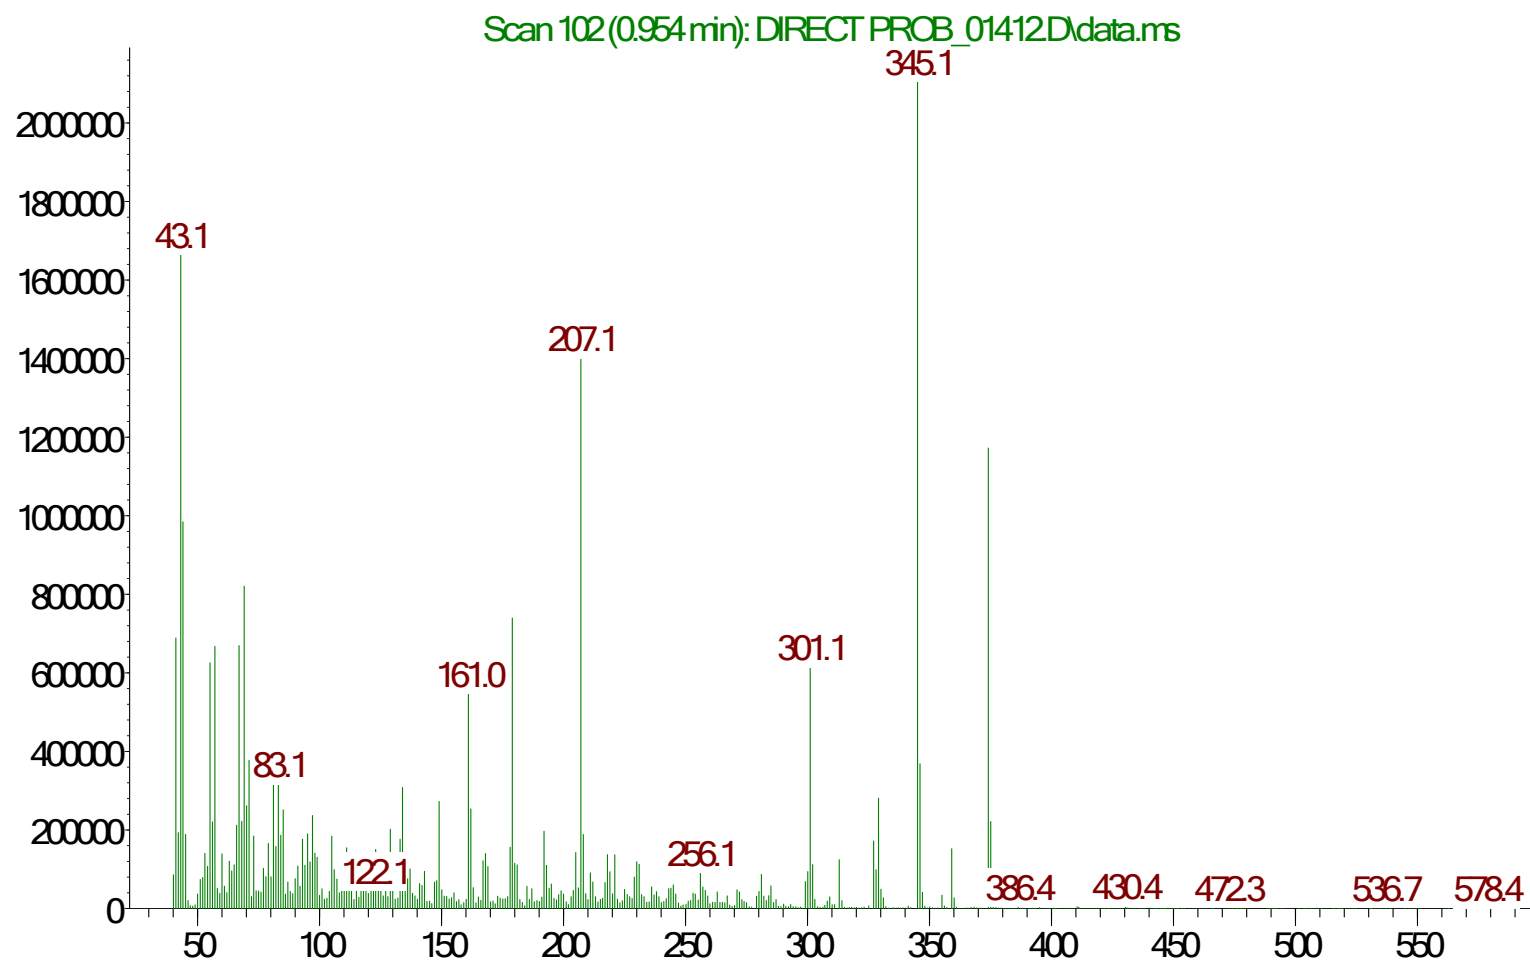

m/z→

**Fig S6.** The Mass spectrea of 5-amino-3-(perfluorophenyl)-1-phenyl-1H-pyrazole-4-carbonitrile (Table 3, entry 5)

Analyst  
Date

Azam Ranjbaran  
Wednesday, February 17, 2016 11:46 AM

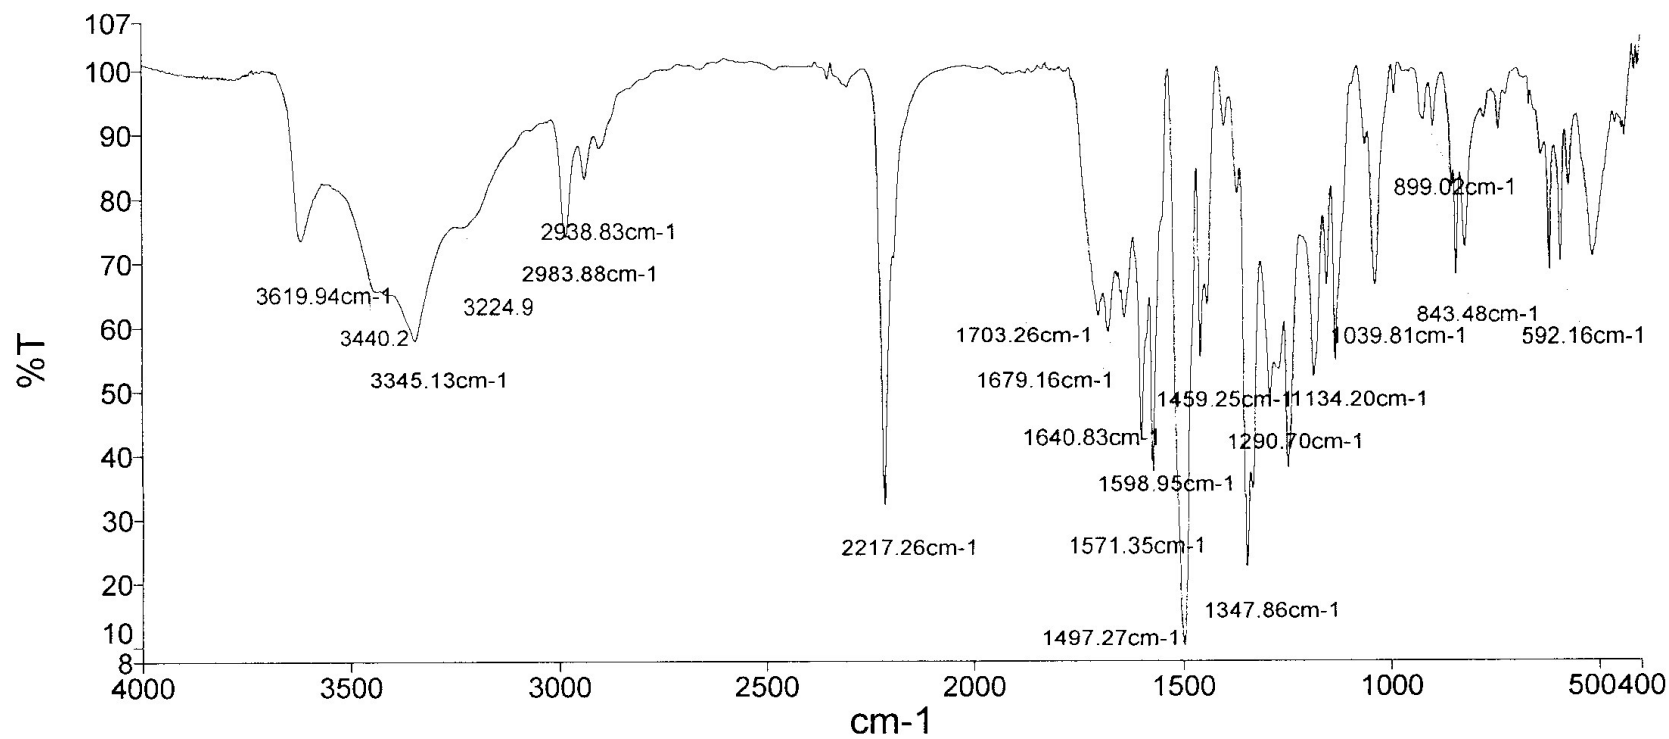

**Fig S7.** The IR of 5-amino-1-phenyl-3-(ferrocene-yl)-1H-pyrazole-4-carbonitrile (Table 3, entry 6)



Abundance

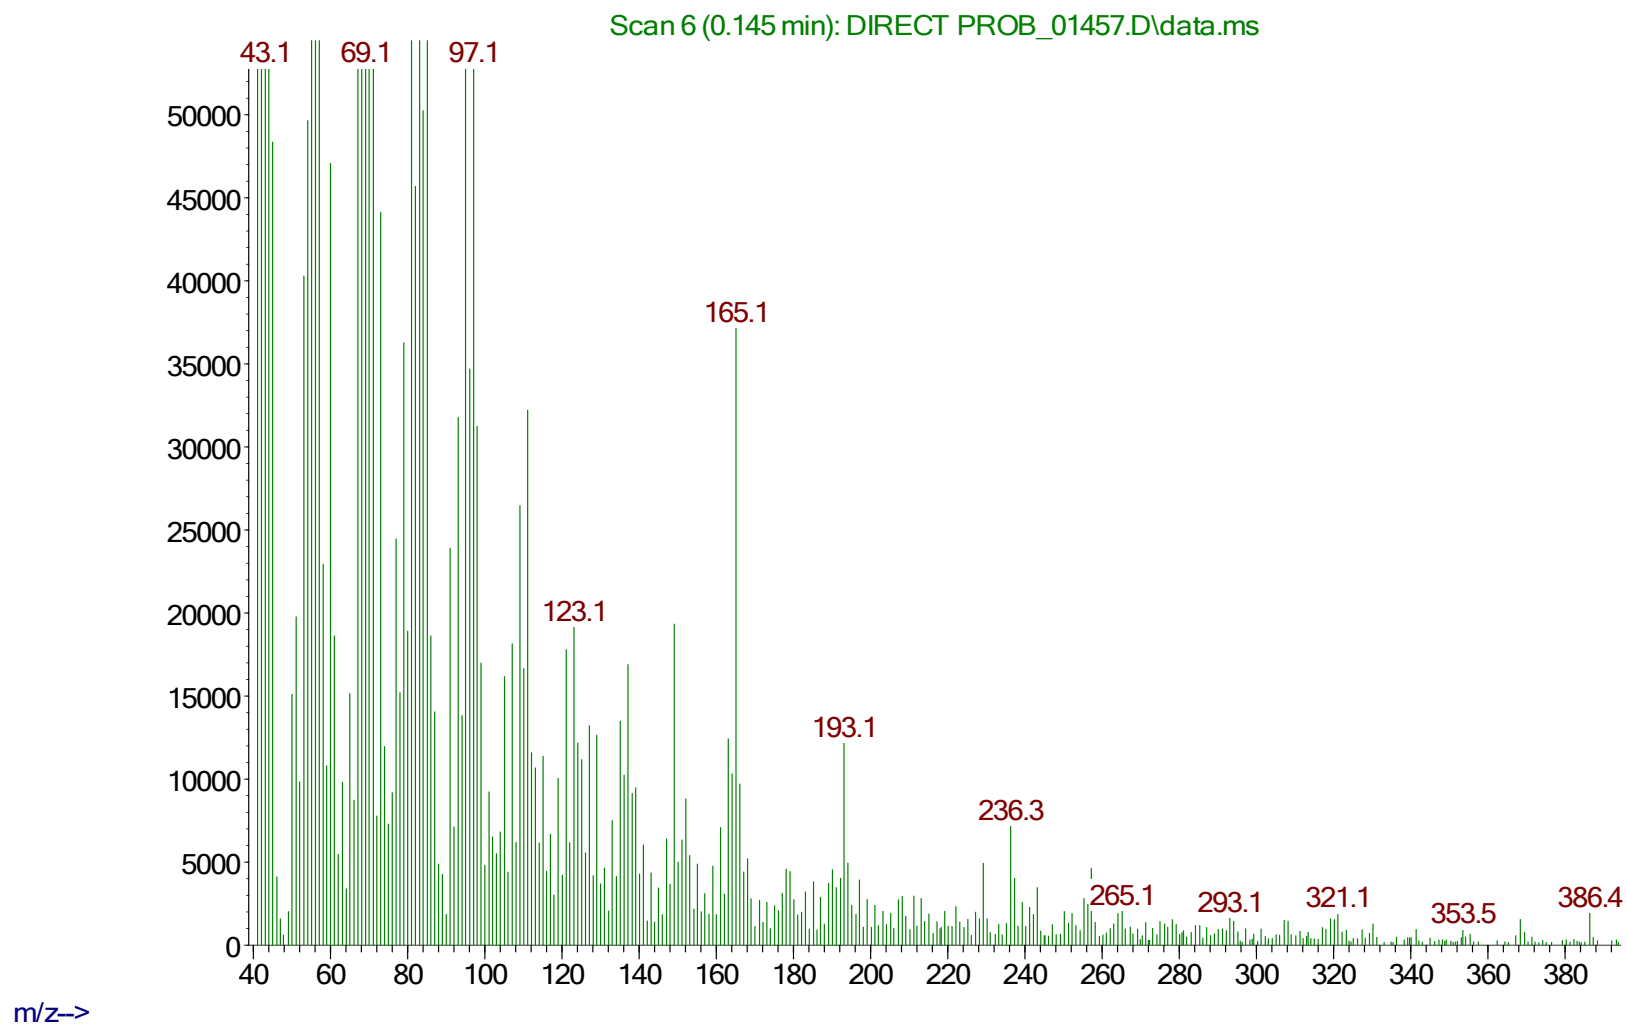

**Fig S8.** The Mass spectrea of 5-amino-1-phenyl-3-(ferrocene-yl)-1H-pyrazole-4-carbonitrile (Table 3, entry 6)

Analyst  
Date

Azam Ranjbaran  
Wednesday, February 17, 2016 11:43 AM

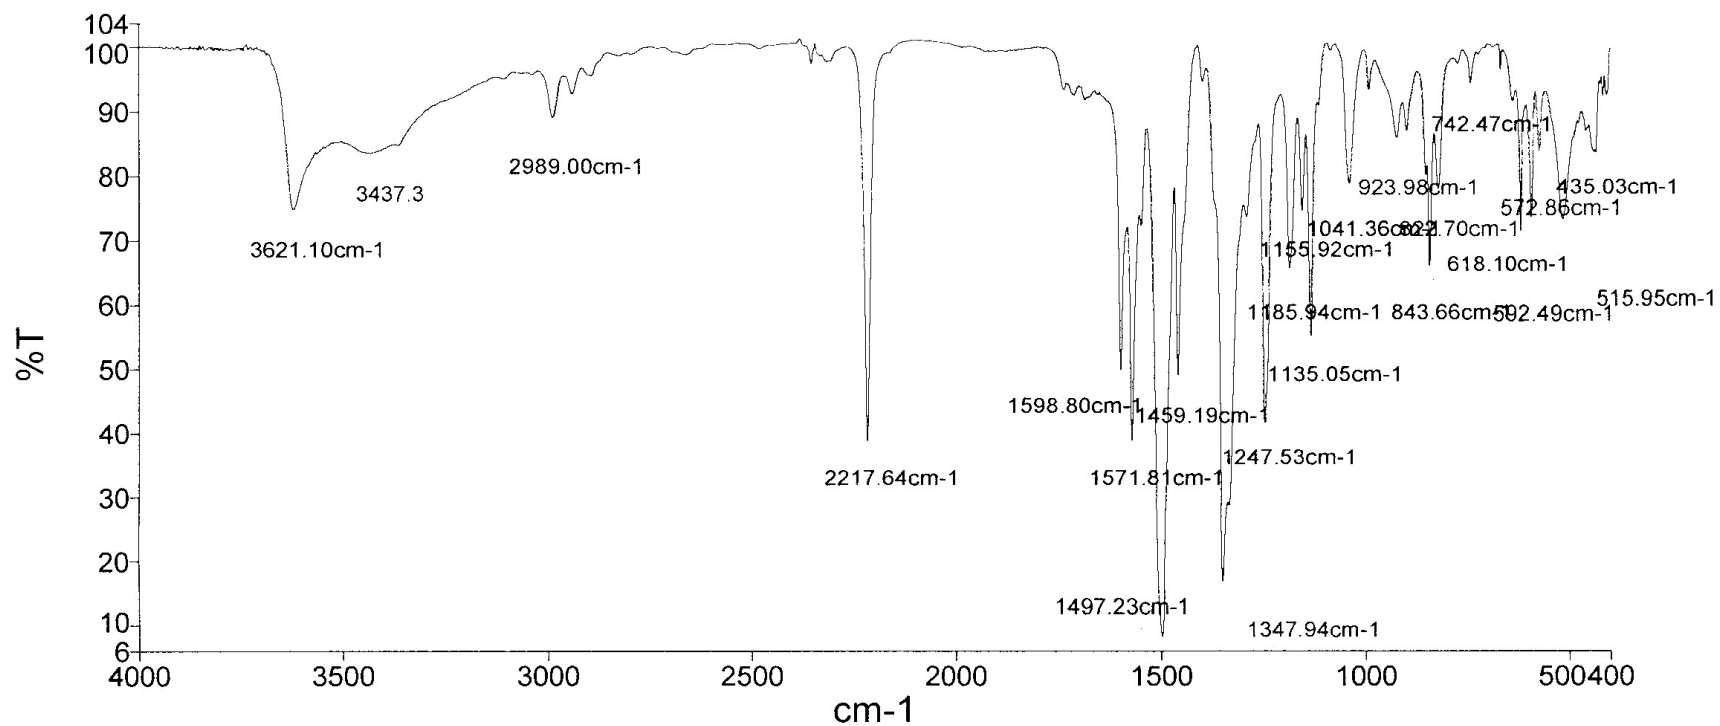

**Fig S9.** The IR of 5-amino-3-(5-fluoro-2-hydroxyphenyl)-1-phenyl-1H-pyrazole-4-carbonitrile: (Table 3, entry 7)

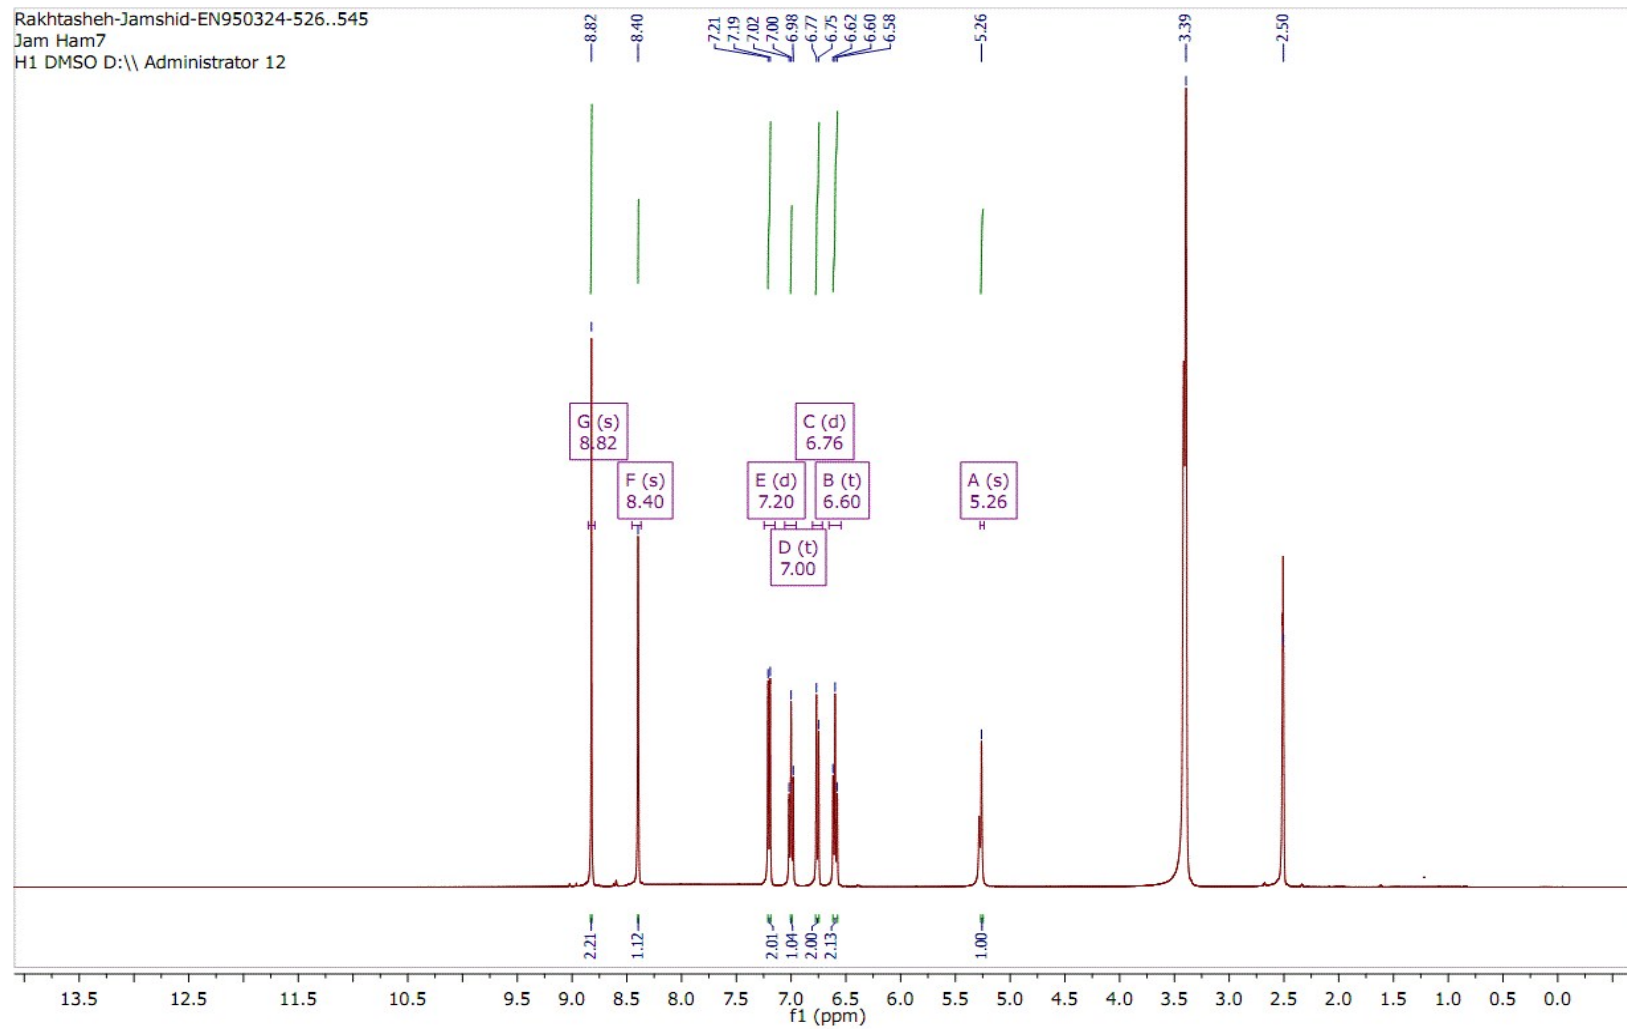

**Fig S10.** The  $^1\text{H}$  NMR of 5-amino-3-(5-fluoro-2-hydroxyphenyl)-1-phenyl-1H-pyrazole-4-carbonitrile: (Table 3, entry 7)

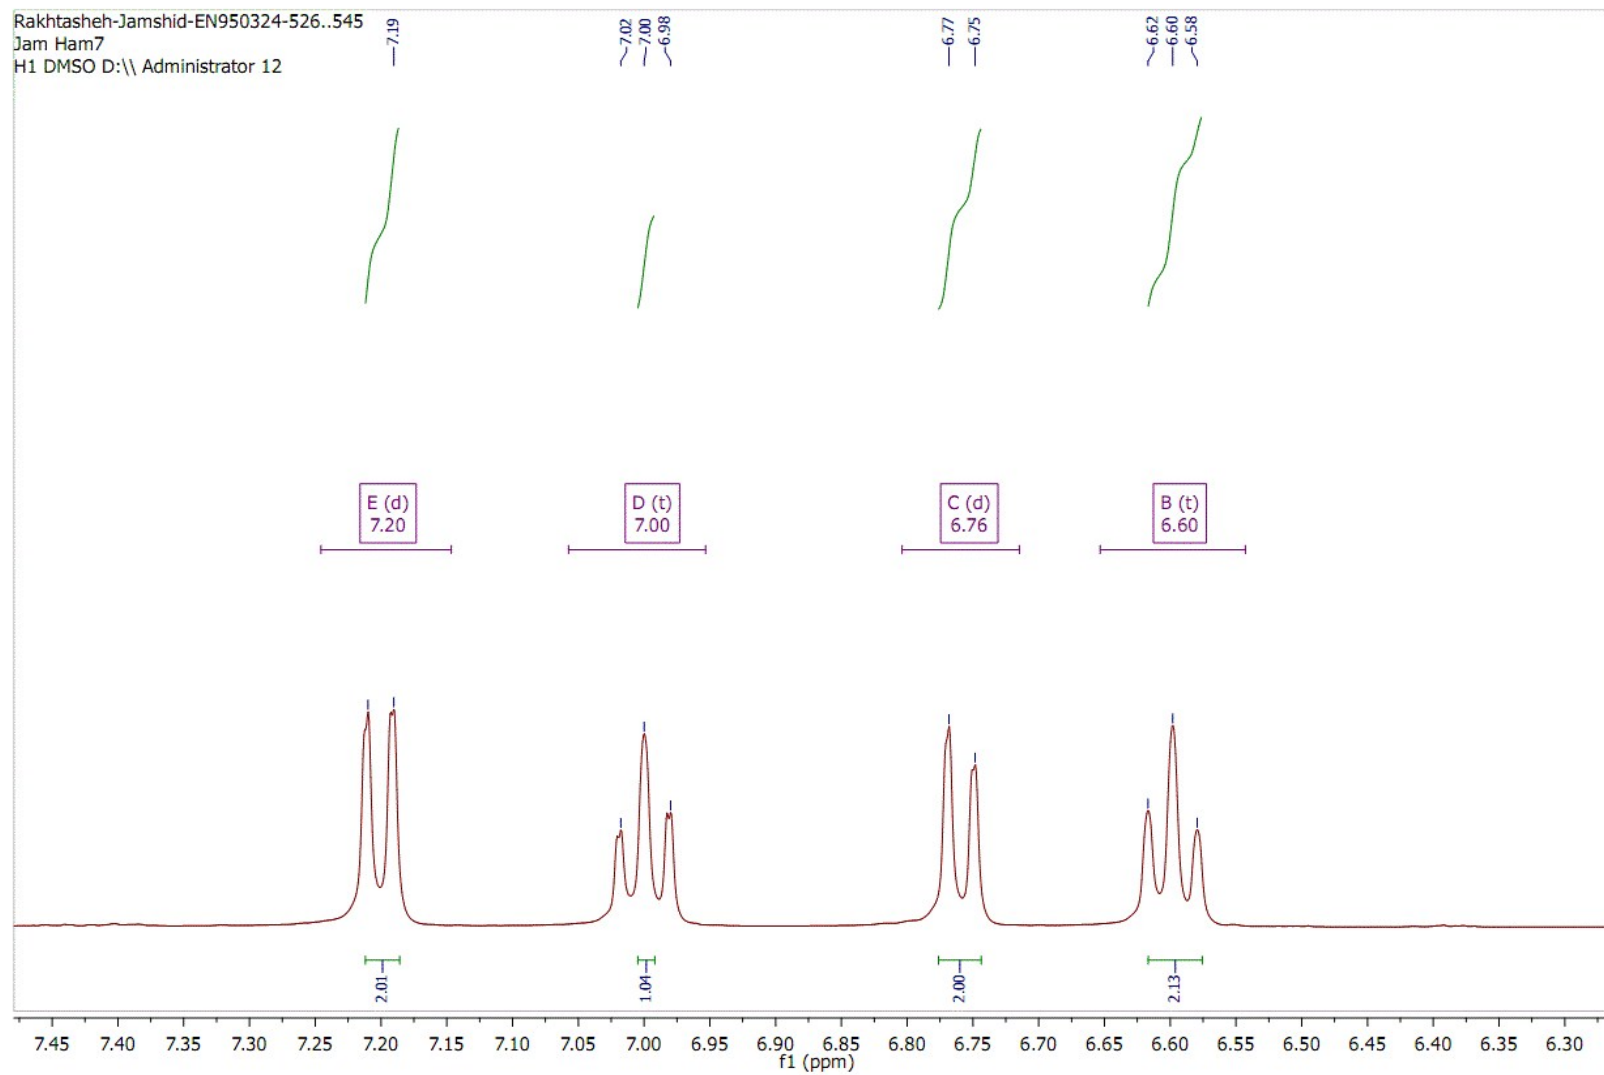

**Fig S11.** The expand  $^1\text{H}$  NMR of 5-amino-3-(5-fluoro-2-hydroxyphenyl)-1-phenyl-1H-pyrazole-4-carbonitrile: (Table 3, entry 7)

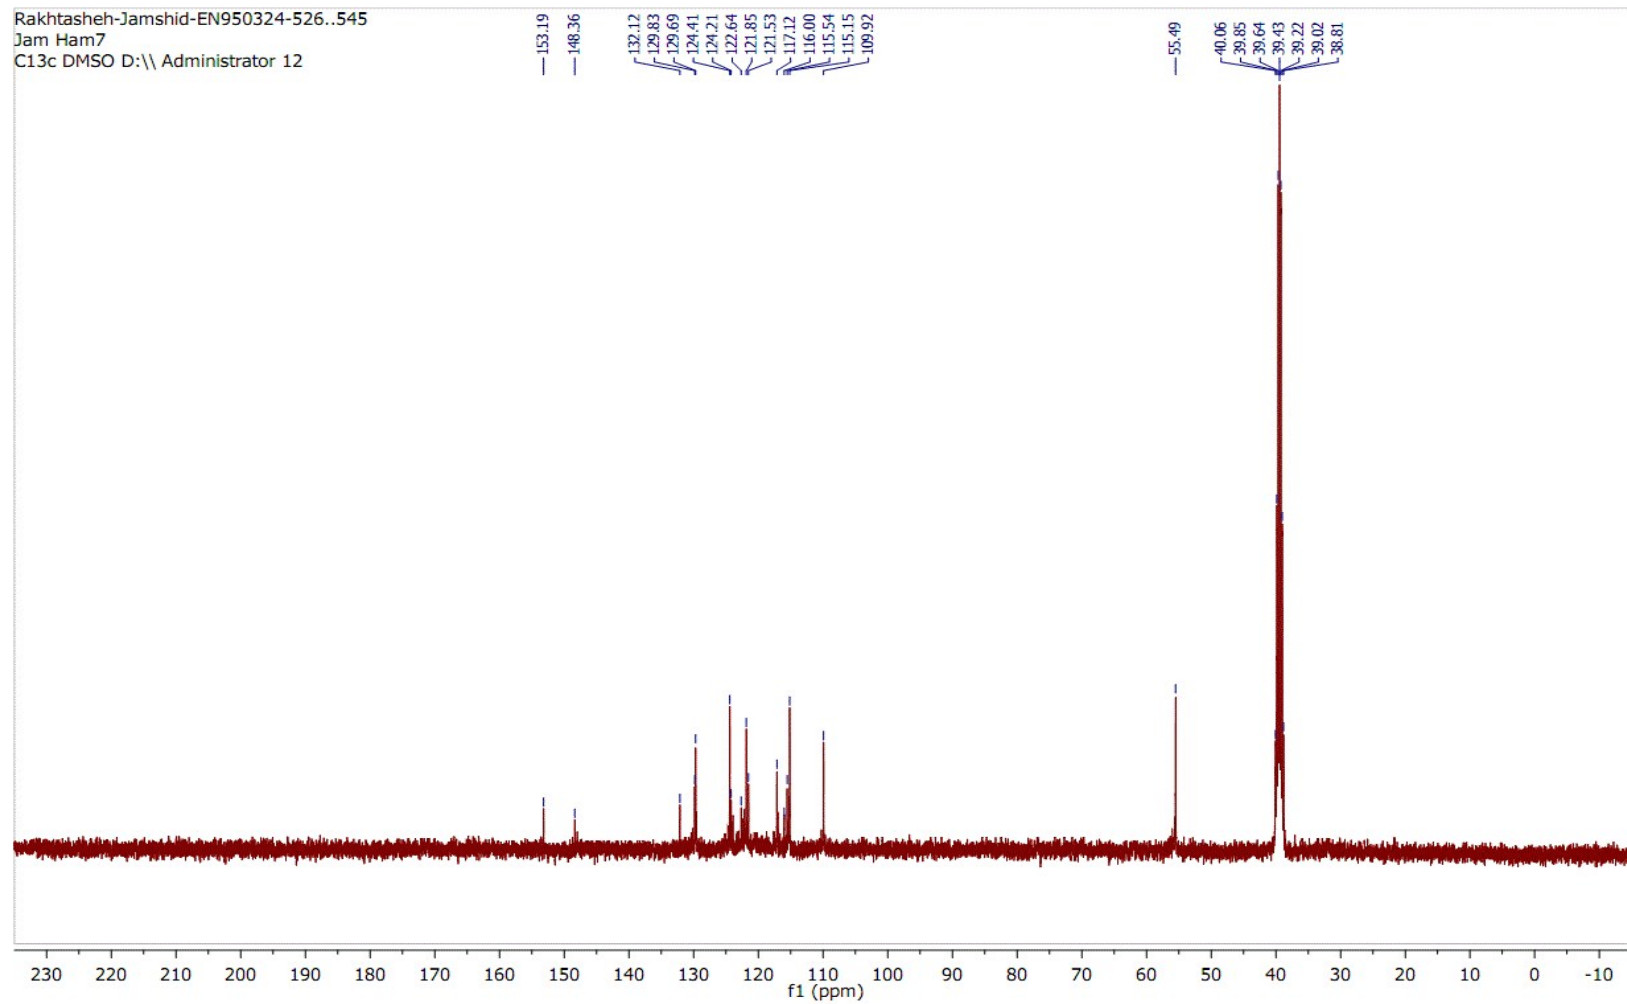

**Fig S12.** The  $^{13}\text{C}$  NMR of 5-amino-3-(5-fluoro-2-hydroxyphenyl)-1-phenyl-1H-pyrazole-4-carbonitrile: (Table 3, entry 7)

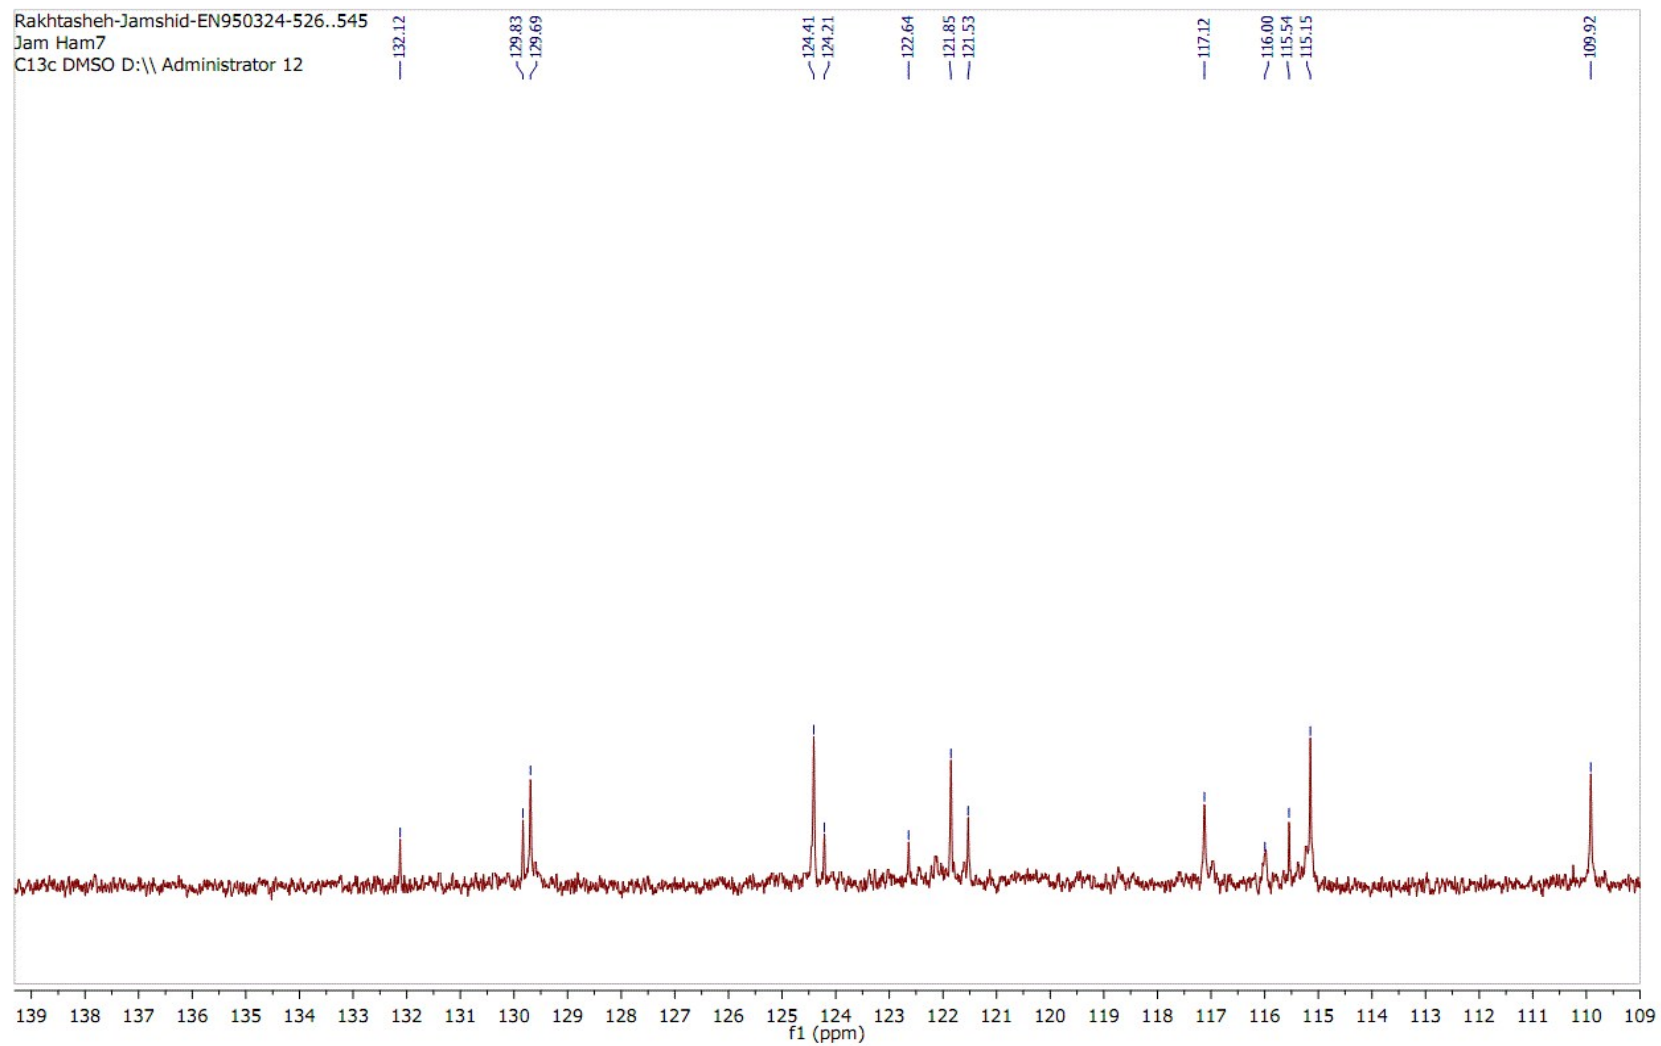

**Fig S13.** The expanded  $^{13}\text{C}$  NMR of 5-amino-3-(5-fluoro-2-hydroxyphenyl)-1-phenyl-1H-pyrazole-4-carbonitrile: (Table 3, entry 7)

Abundance

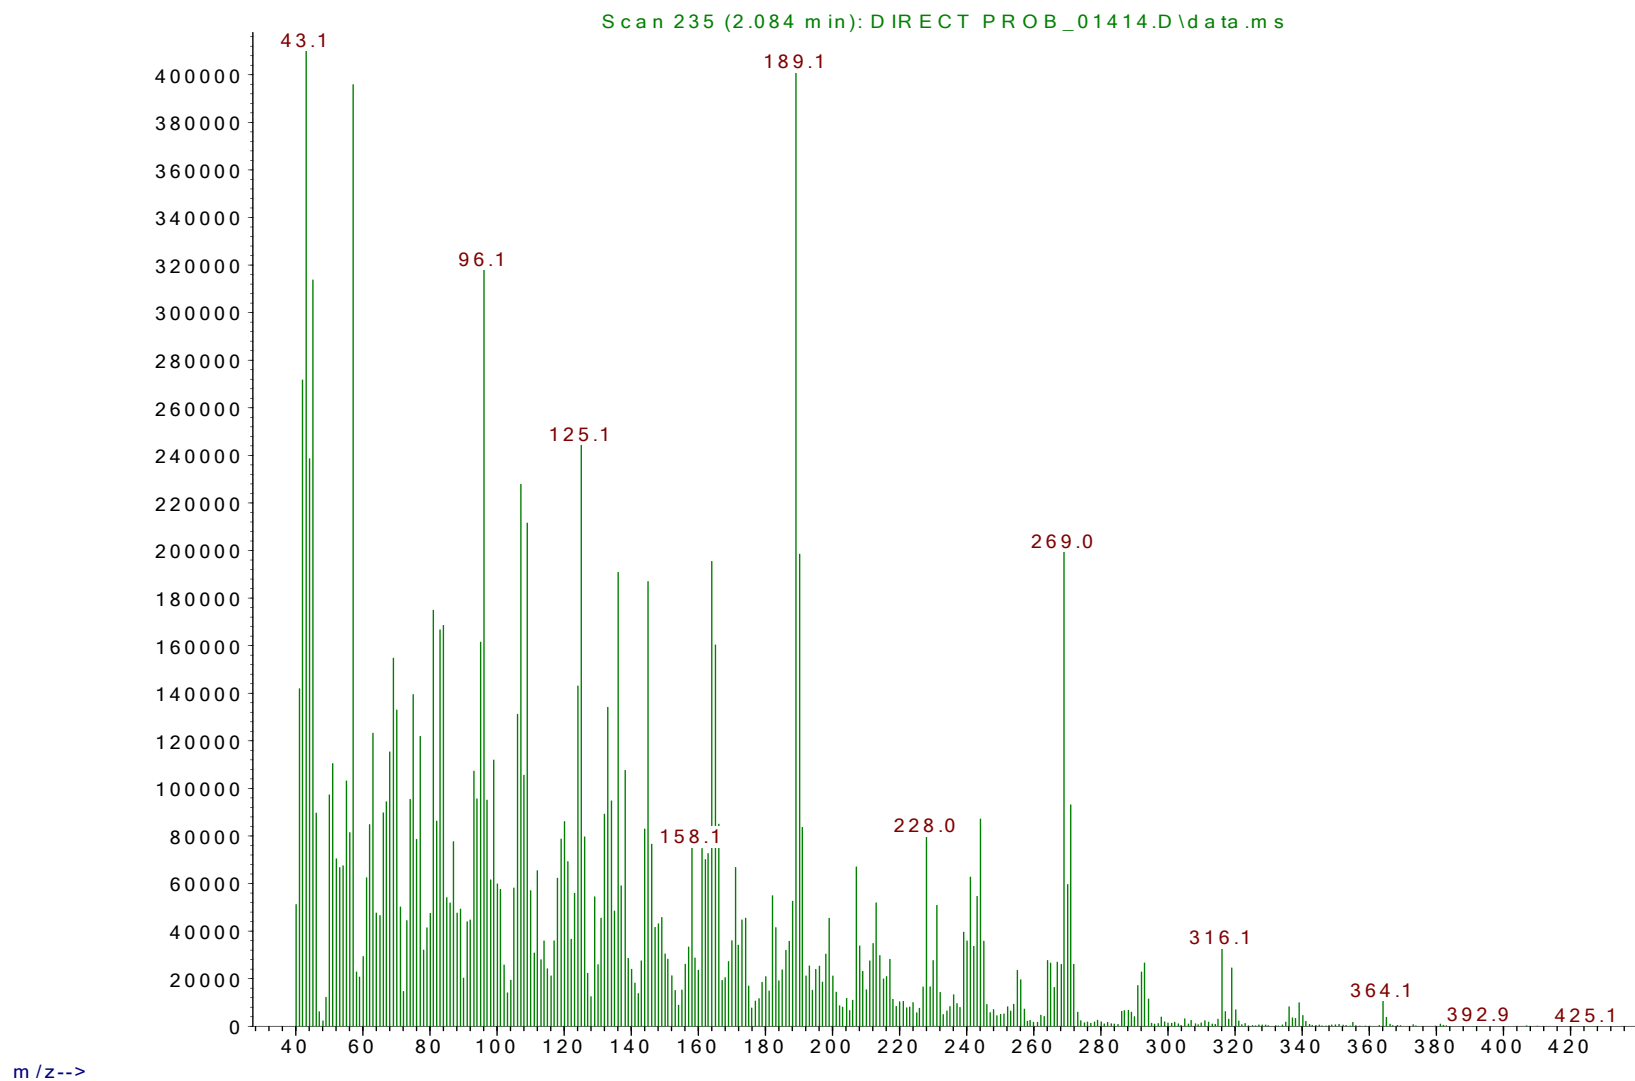

**Fig S14.** The Mass spectra of 5-amino-3-(5-fluoro-2-hydroxyphenyl)-1-phenyl-1H-pyrazole-4-carbonitrile: (Table 3, entry 7)

Analyst  
Date

Azam Ranjbaran  
Monday, February 15, 2016 11:44 AM

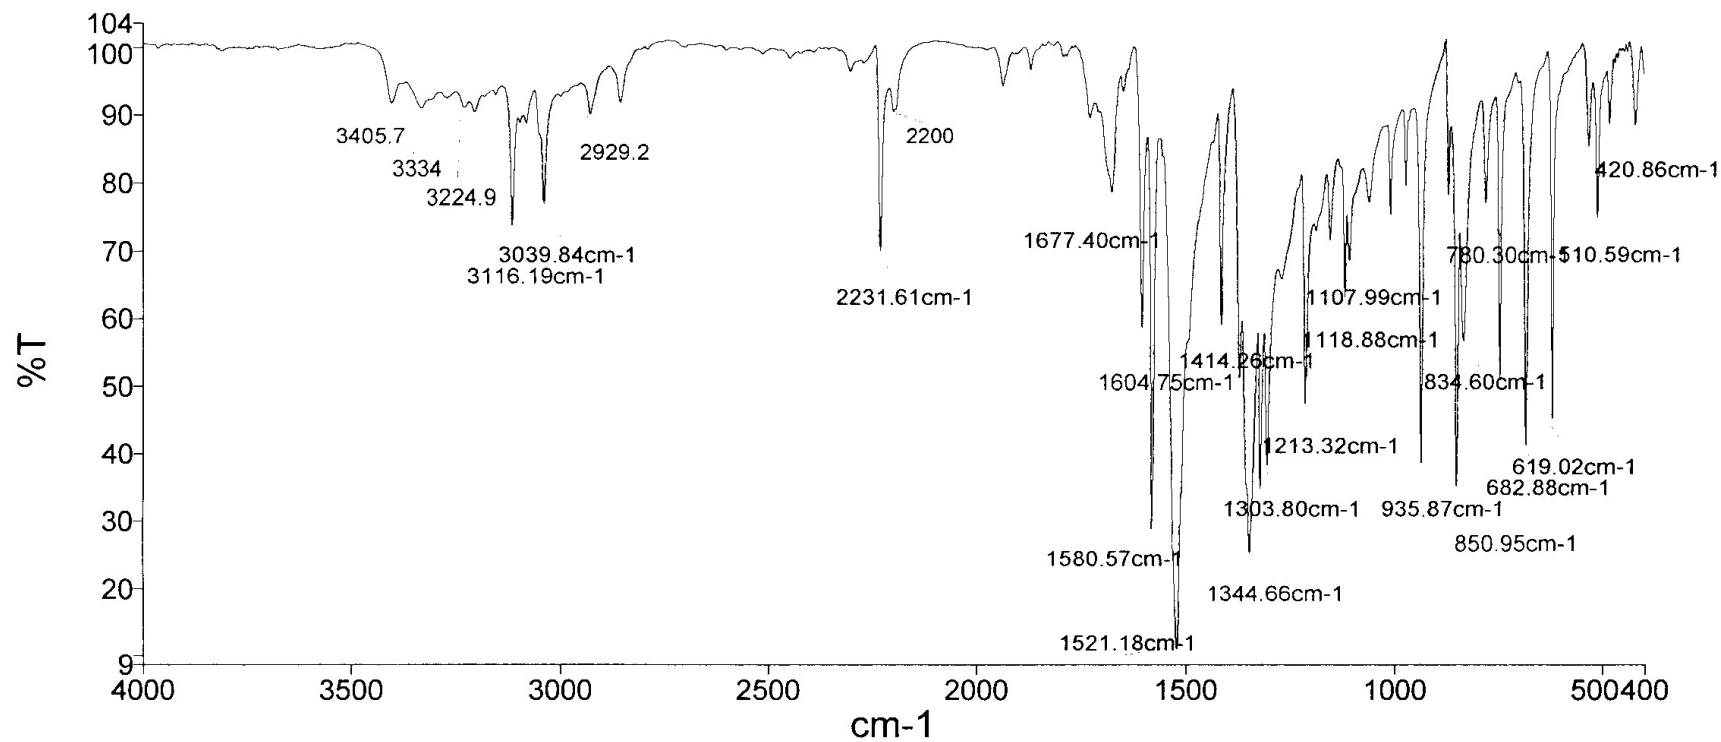

**Fig S15.** The IR of 5-amino-1-phenyl-3-(1H-pyrrol-2-yl)-1H-pyrazole-4-carbonitrile: (Table 3, entry 8)



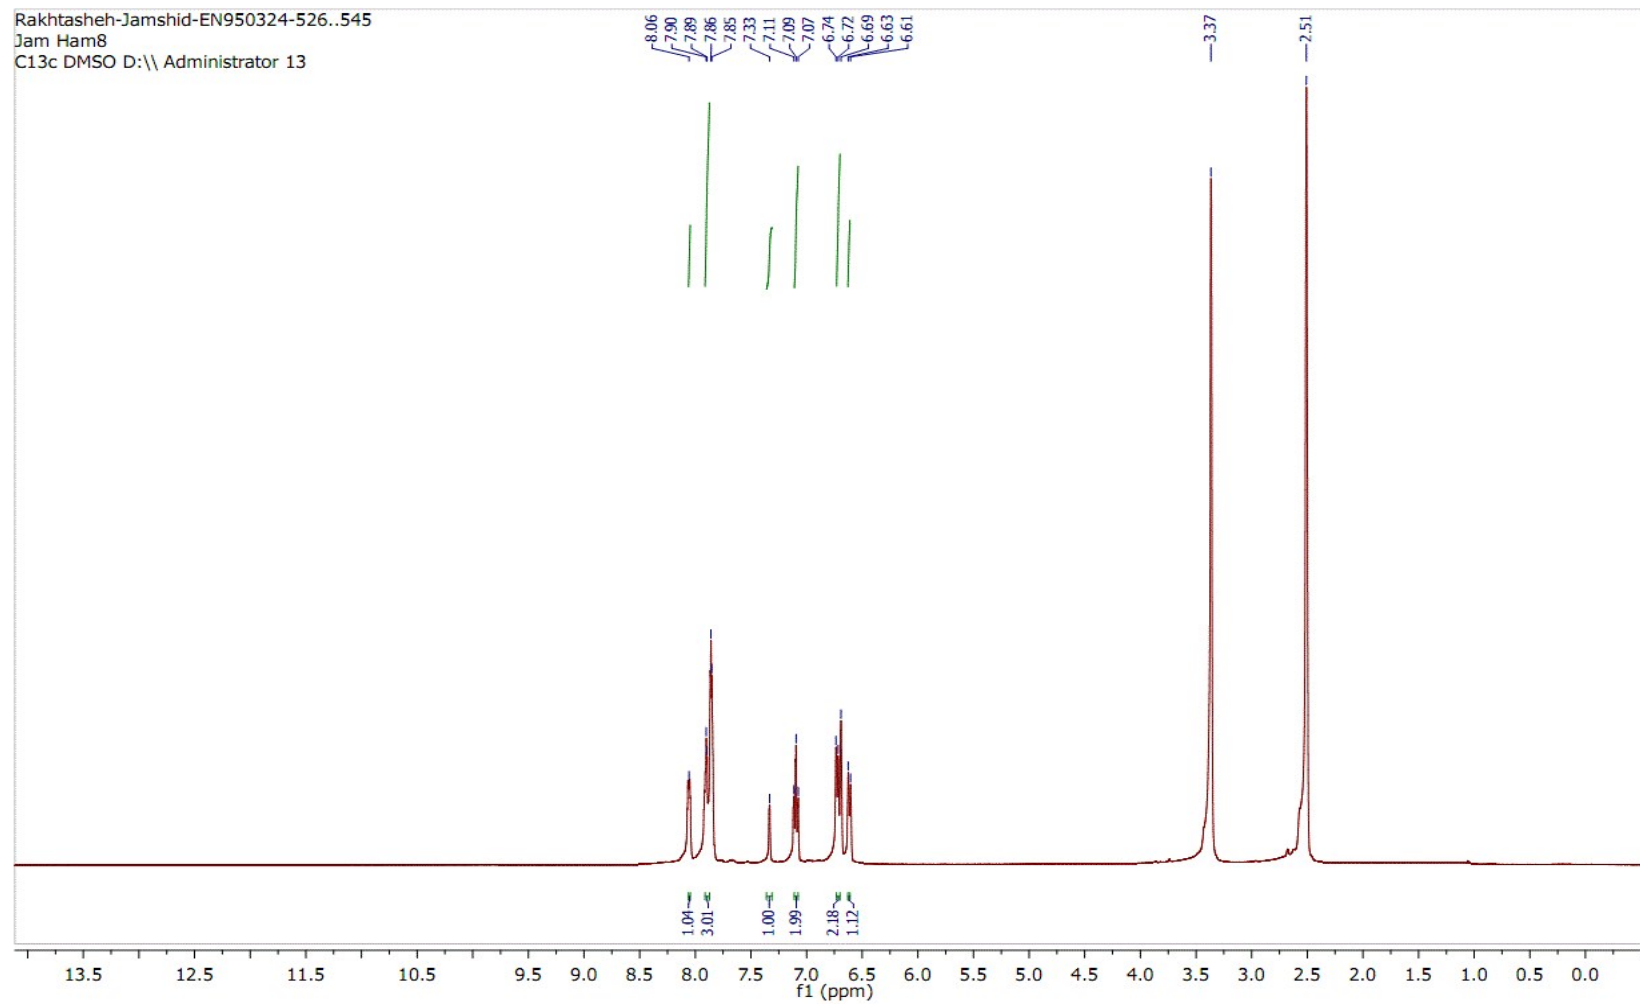

**Fig S16.** The  $^1\text{H}$  NMR of 5-amino-1-phenyl-3-(1H-pyrrol-2-yl)-1H-pyrazole-4-carbonitrile: (Table 3, entry 8)

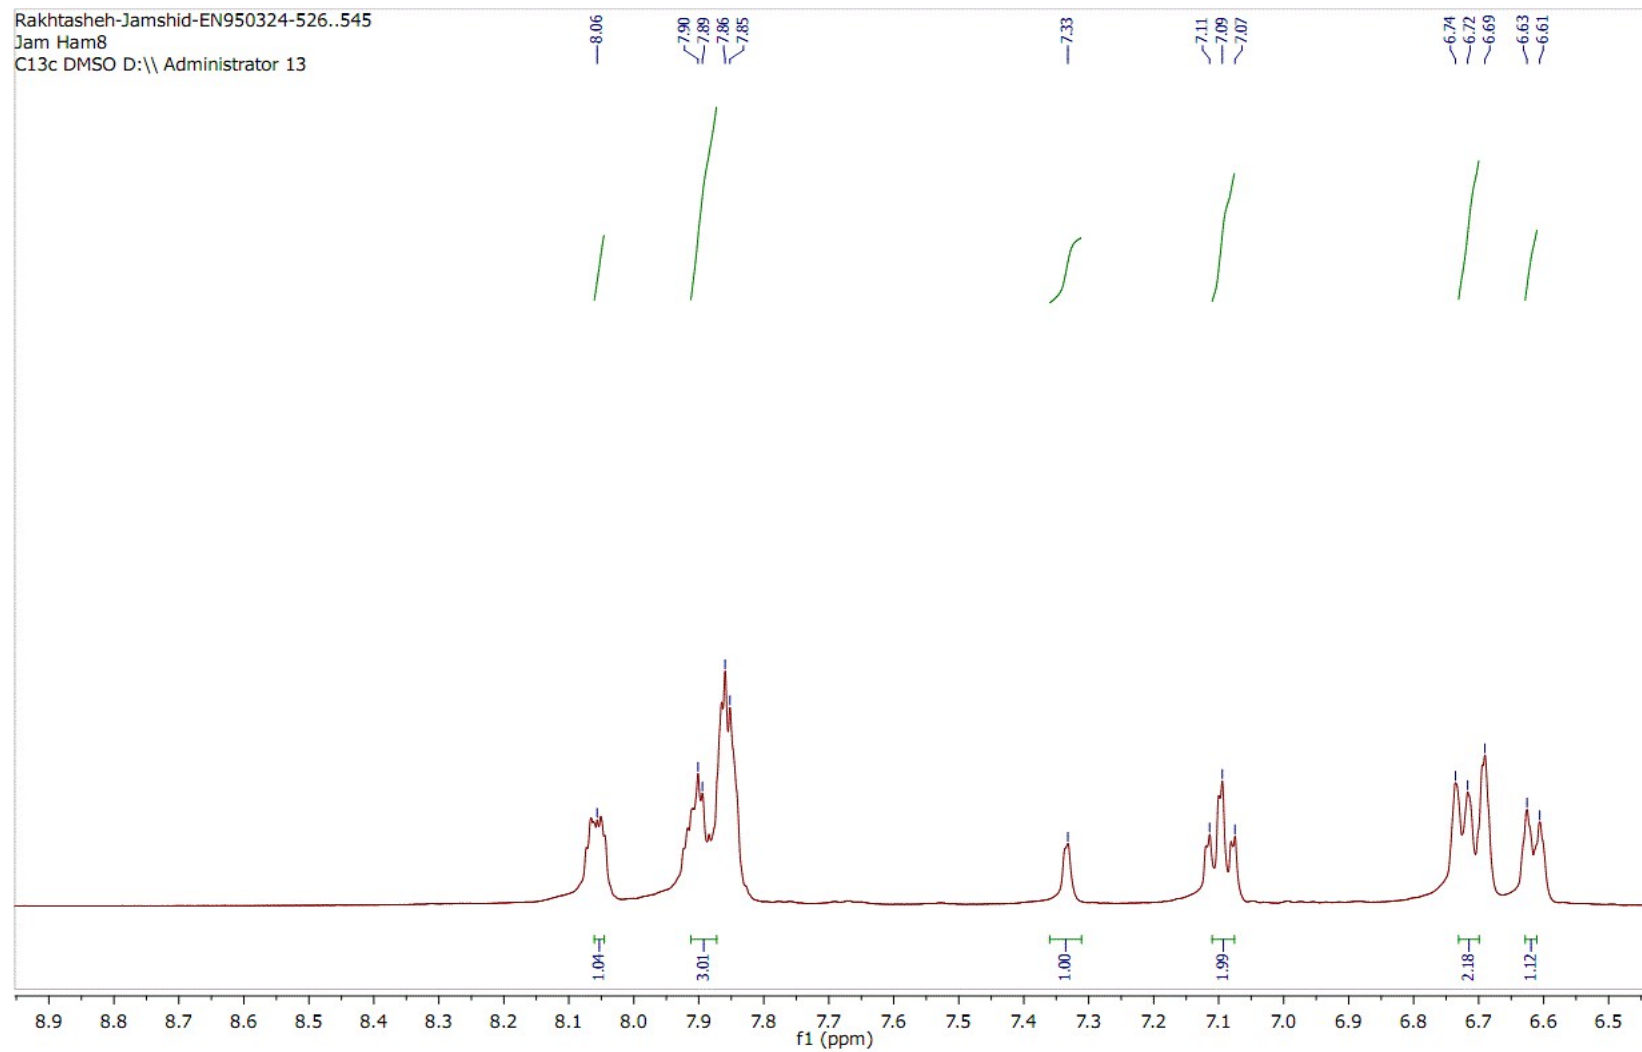

**Fig S17.** The expanded  $^1\text{H}$  NMR of 5-amino-1-phenyl-3-(1H-pyrrol-2-yl)-1H-pyrazole-4-carbonitrile: (Table 3, entry 8)

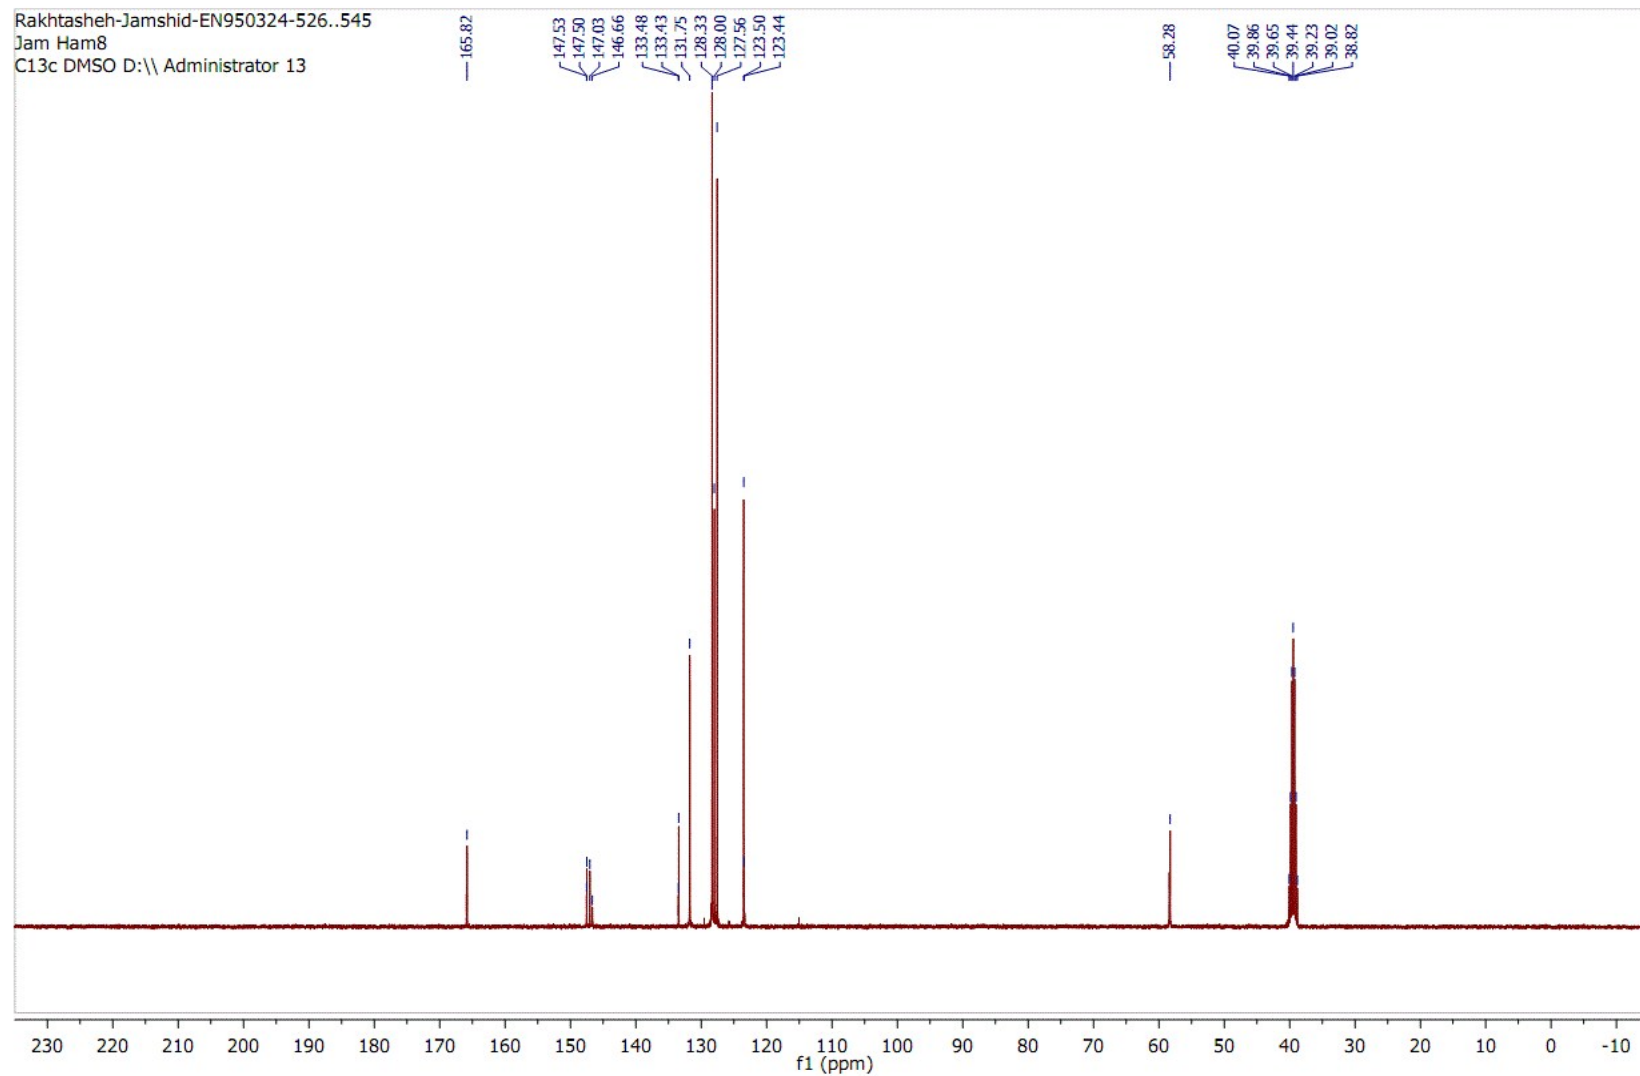

**Fig S18.** The  $^{13}\text{C}$  NMR of 5-amino-1-phenyl-3-(1H-pyrrol-2-yl)-1H-pyrazole-4-carbonitrile: (Table 3, entry 8)

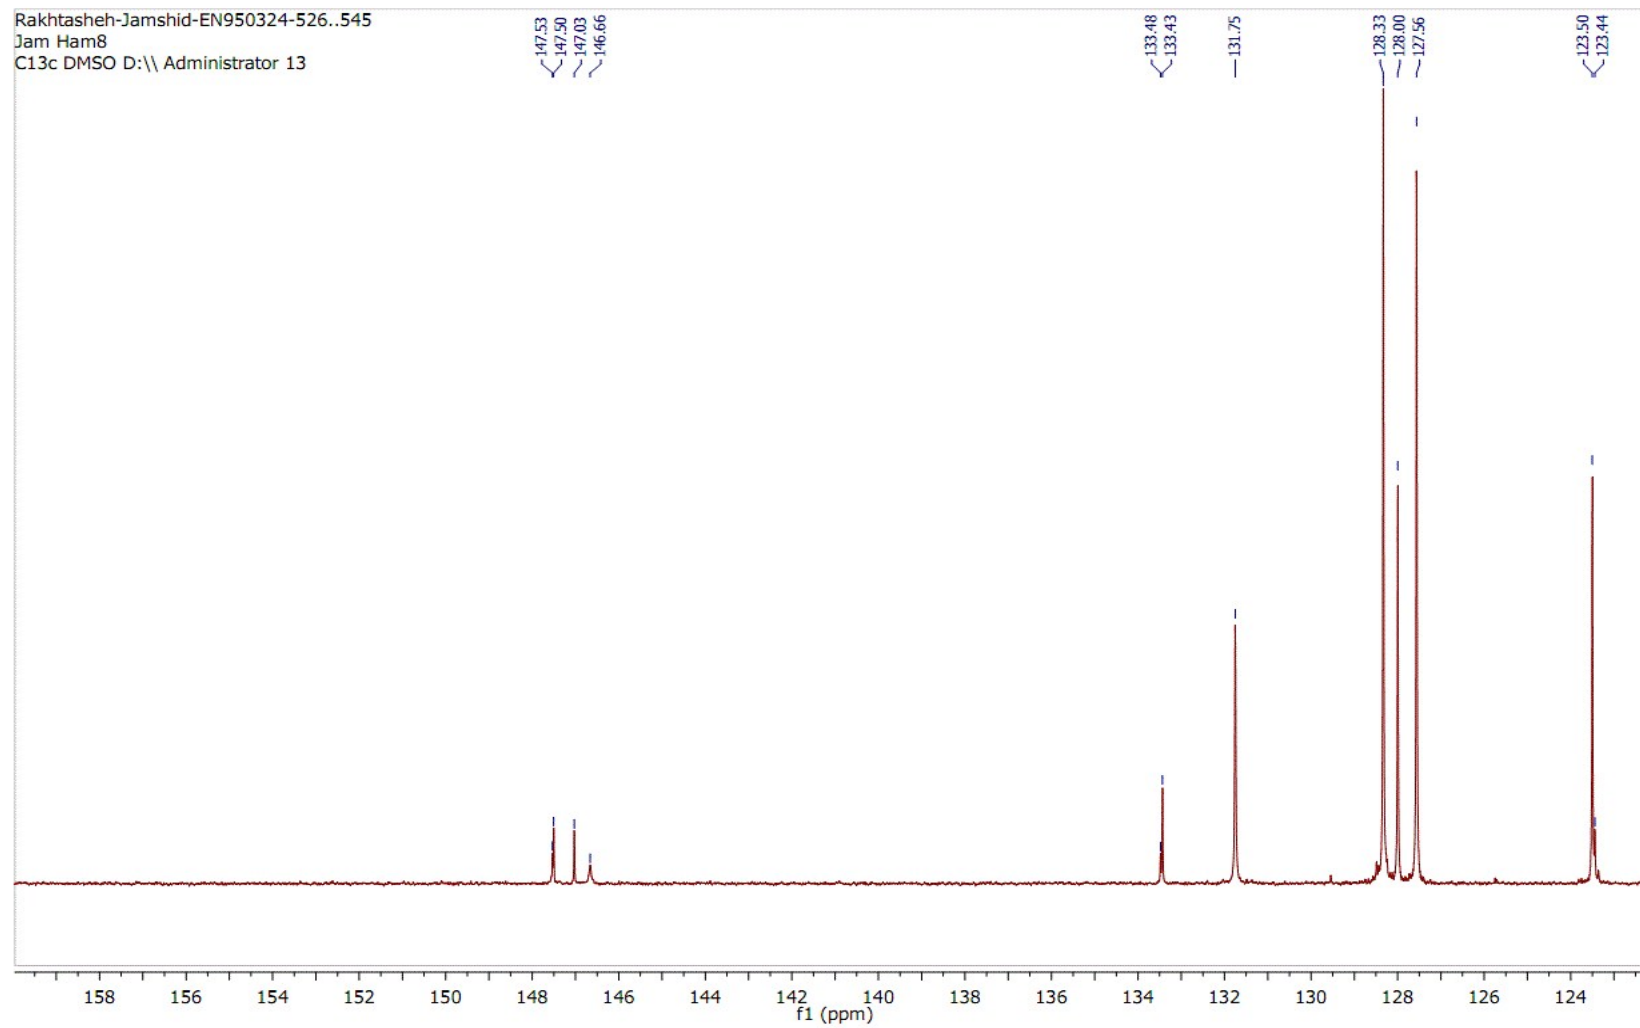

**Fig S19.** The expanded  $^{13}\text{C}$  NMR of 5-amino-1-phenyl-3-(1H-pyrrol-2-yl)-1H-pyrazole-4-carbonitrile: (Table 3, entry 8)

Abundance

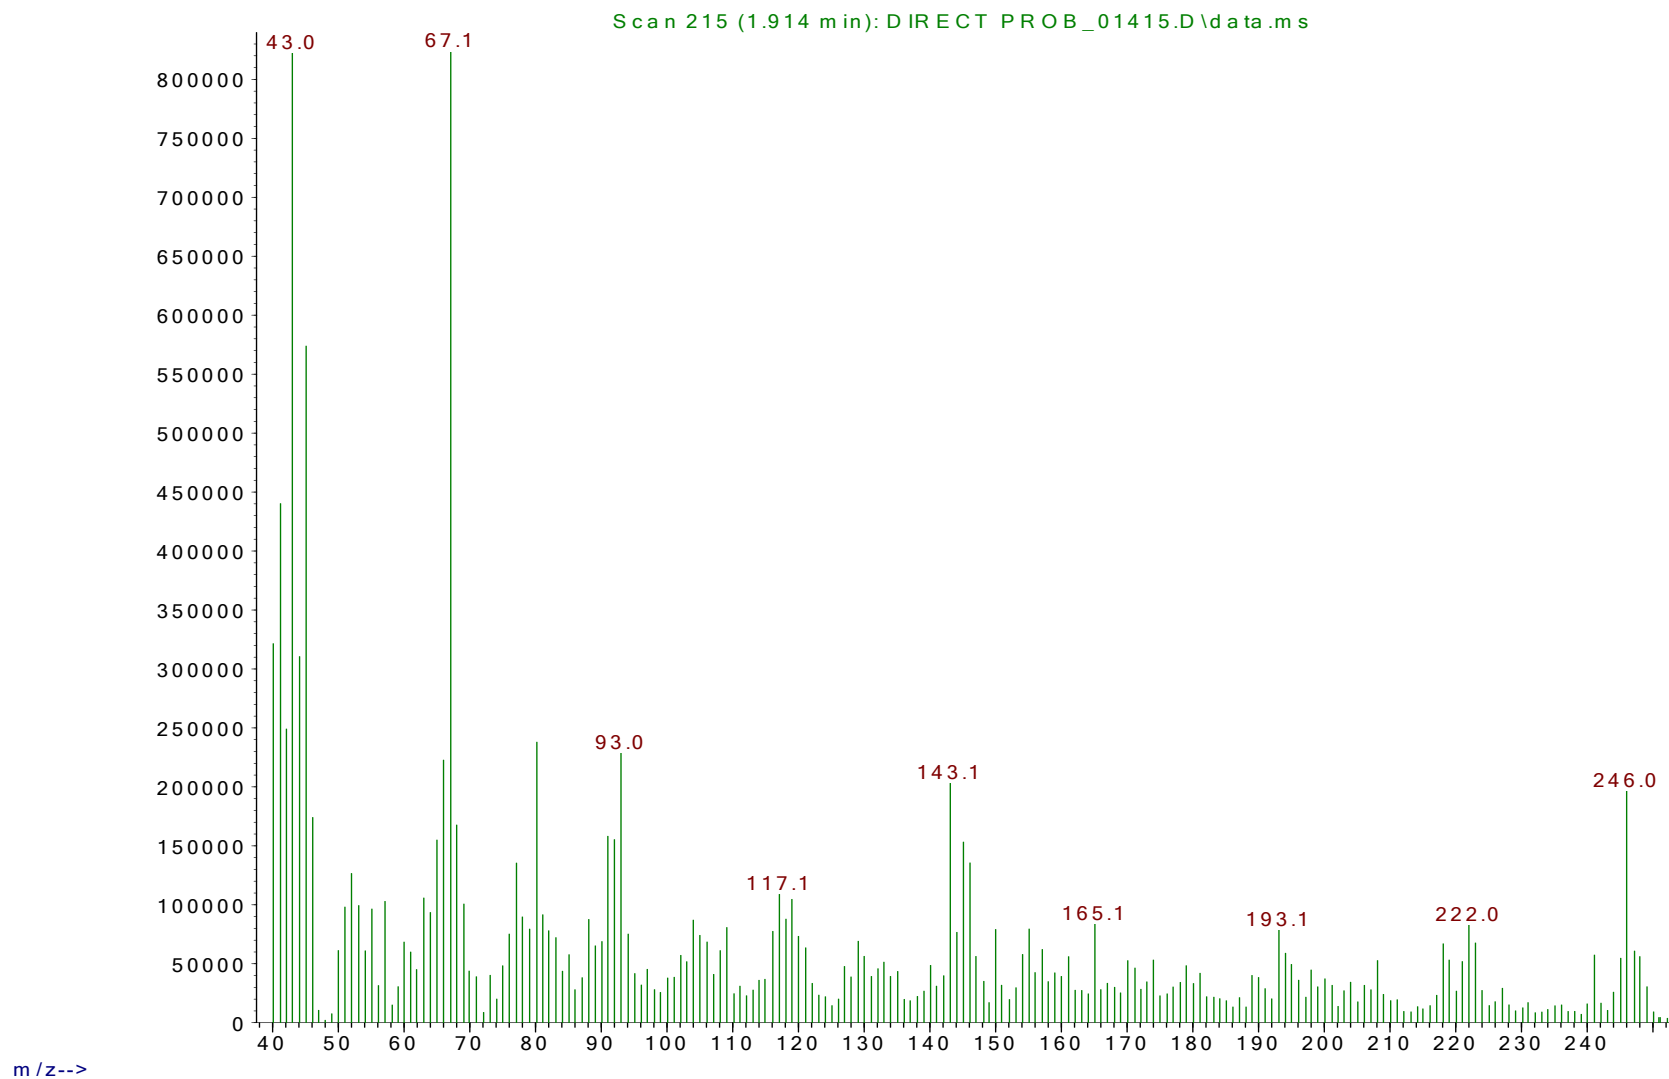

**Fig S20.** The Mass spectra of 5-amino-1-phenyl-3-(1H-pyrrol-2-yl)-1H-pyrazole-4-carbonitrile: (Table 3, entry 8)

Analyst

Azam Ranjbaran

Date

Monday, February 15, 2016 11:47 AM

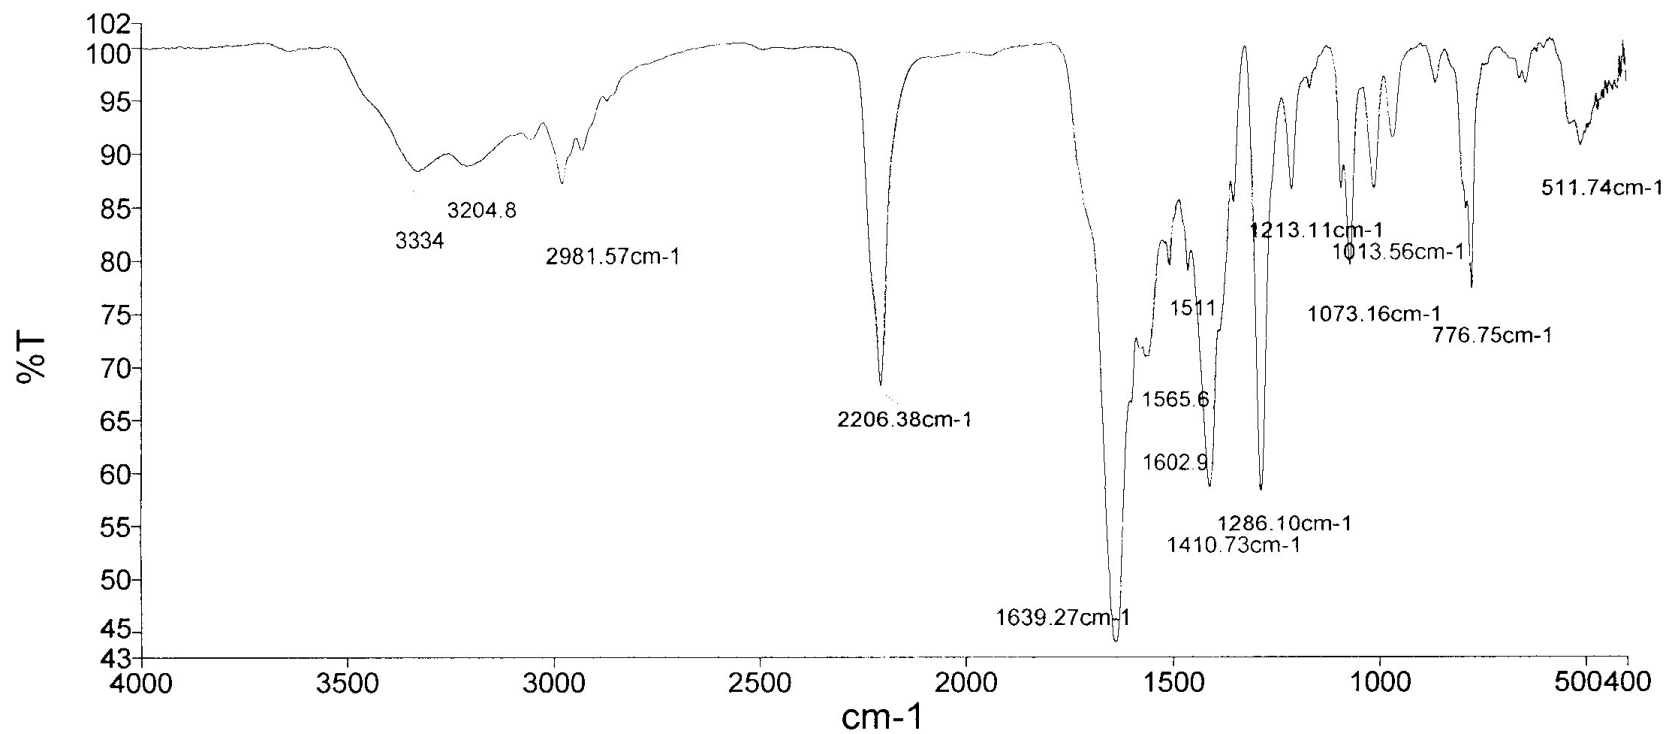

**Fig S21.** The IR of 5-amino-3-(furan-2-yl)-1-phenyl-1H-pyrazole-4-carbonitrile: (Table 3, entry 12)

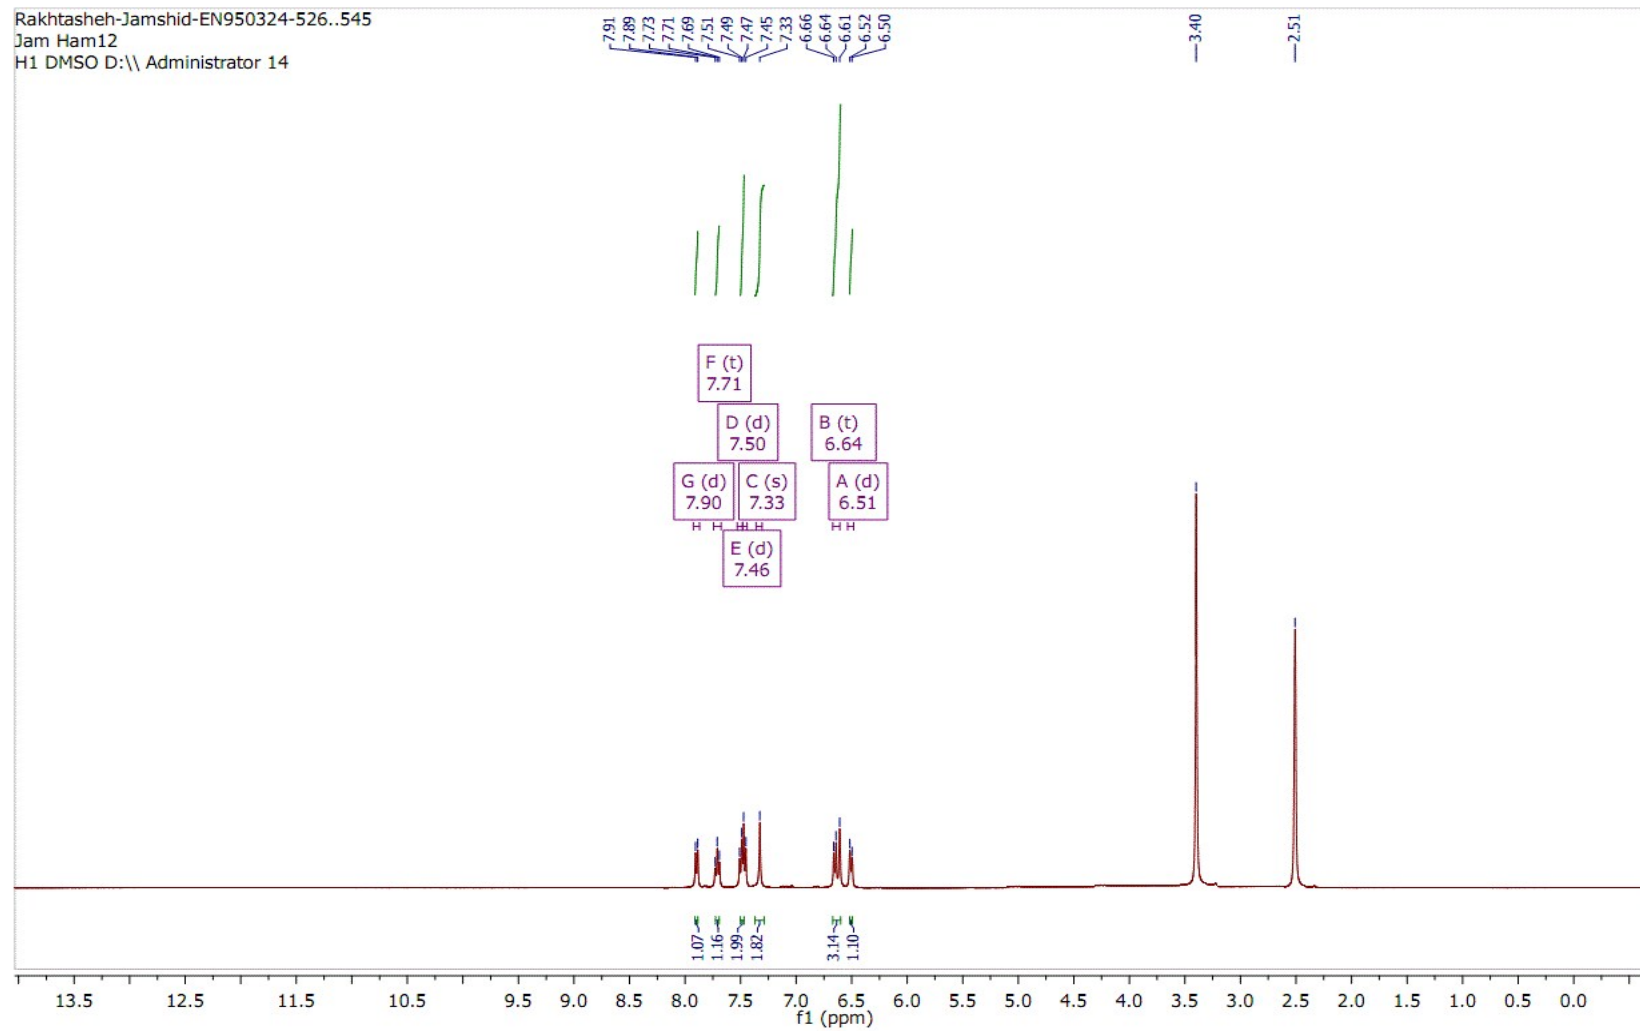

**Fig S22.** The  $^1\text{H}$  NMR of 5-amino-3-(furan-2-yl)-1-phenyl-1H-pyrazole-4-carbonitrile: (Table 3, entry 12)

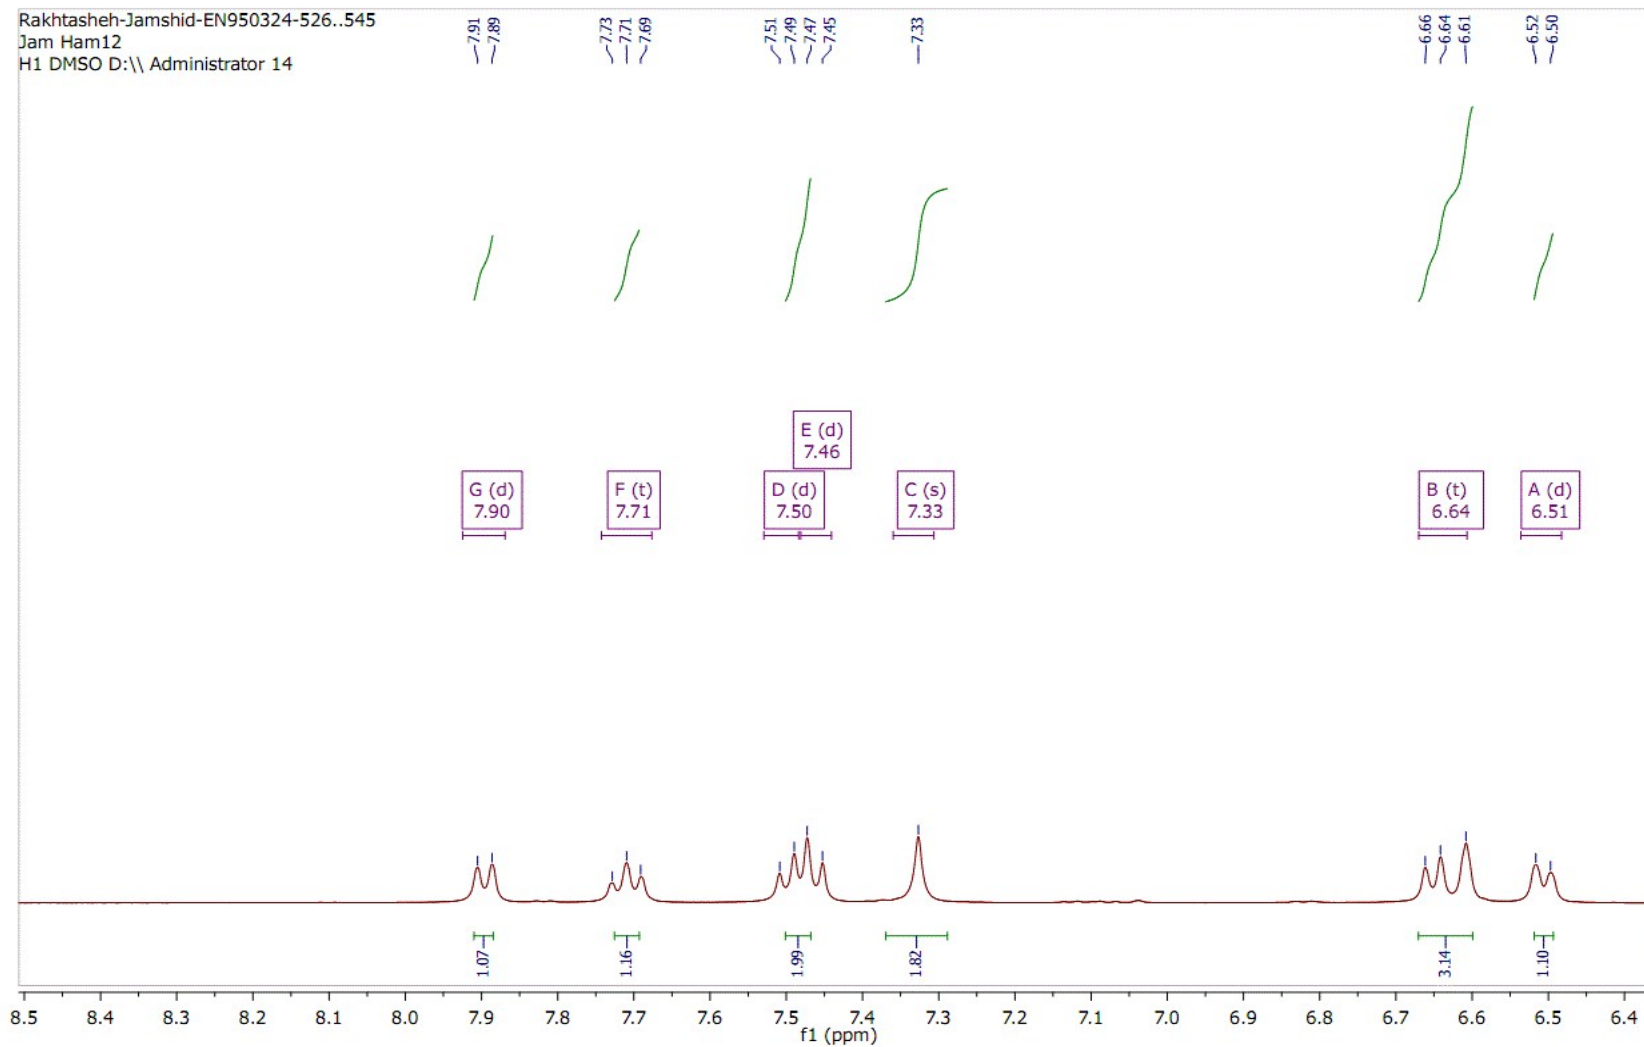

**Fig S23.** The expanded  $^1\text{H}$  NMR of 5-amino-3-(furan-2-yl)-1-phenyl-1H-pyrazole-4-carbonitrile: (Table 3, entry 12)



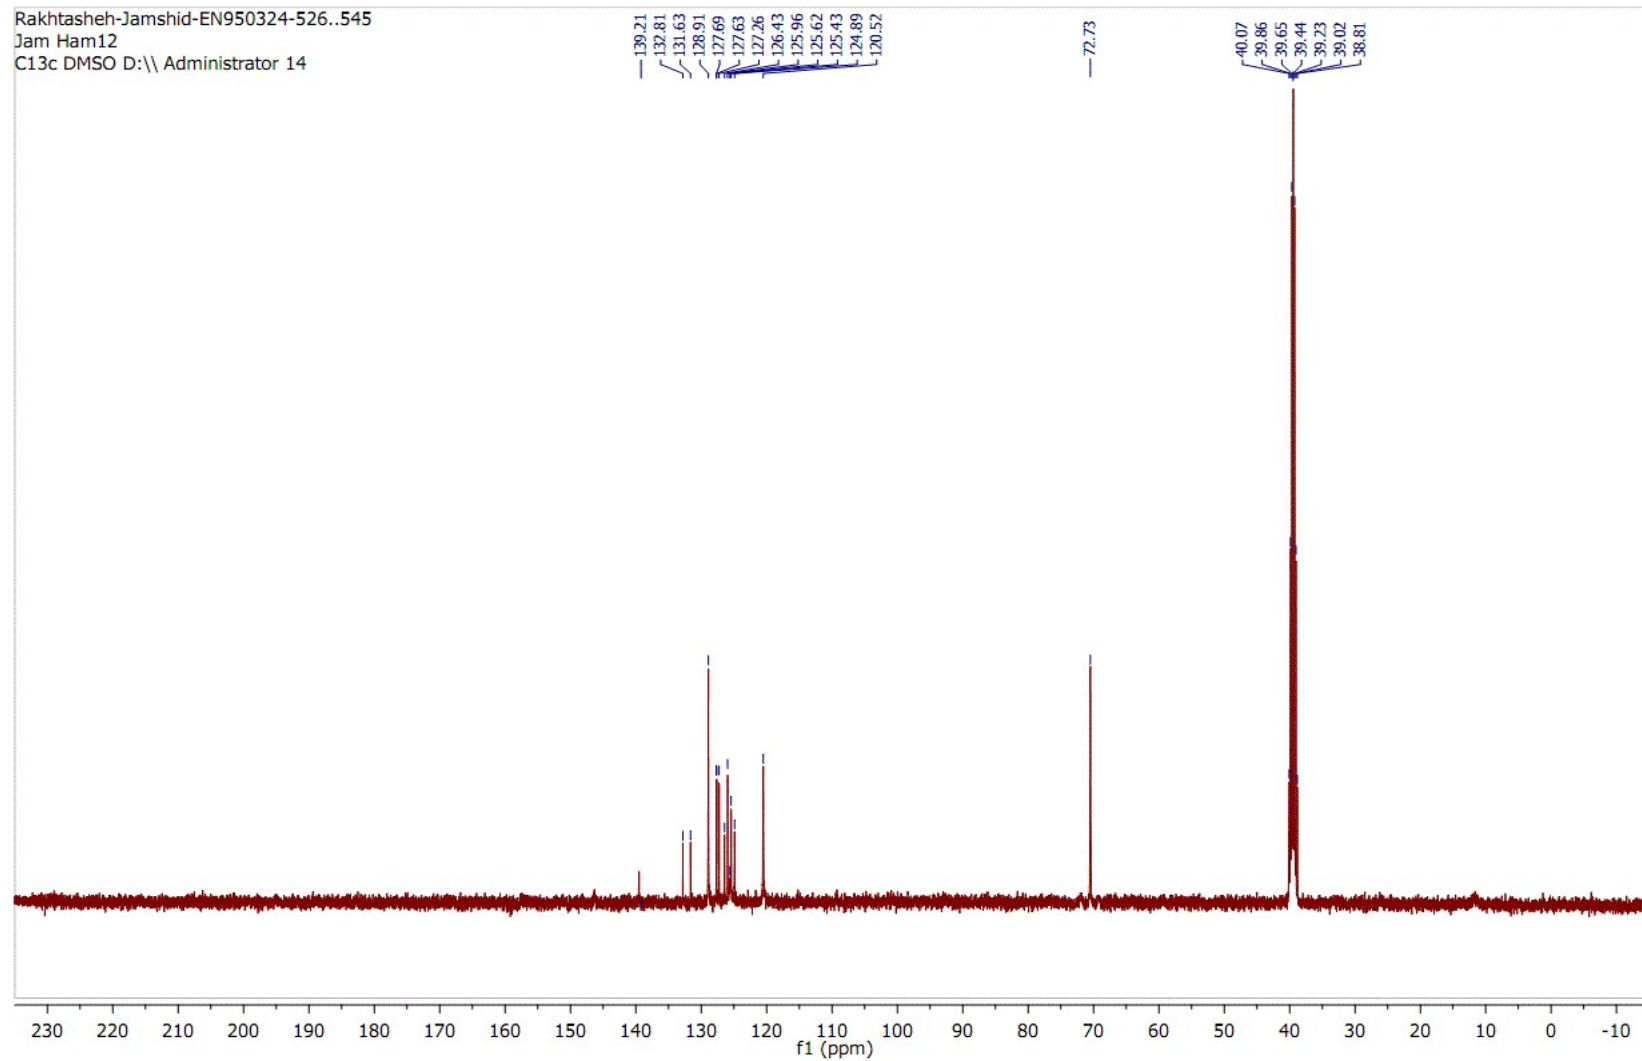

**Fig S24.** The  $^{13}\text{C}$  NMR of 5-amino-3-(furan-2-yl)-1-phenyl-1H-pyrazole-4-carbonitrile: (Table 3, entry 12)

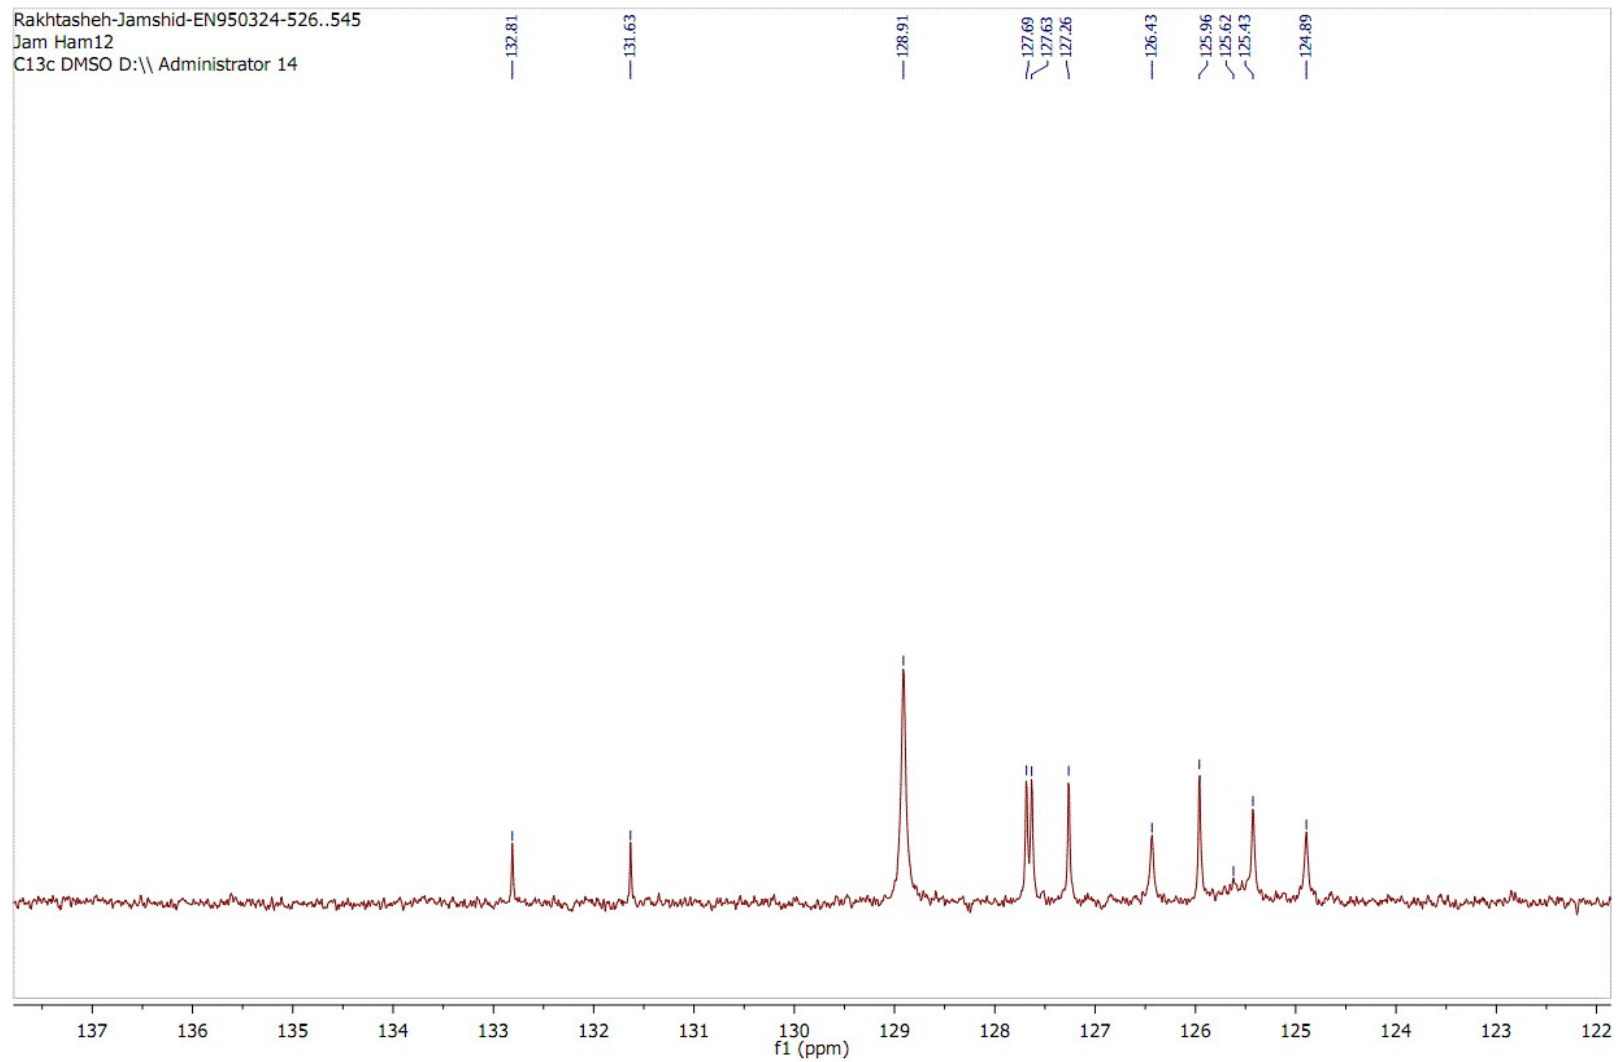

**Fig S25.** The expanded  $^{13}\text{C}$  NMR of 5-amino-3-(furan-2-yl)-1-phenyl-1H-pyrazole-4-carbonitrile: (Table 3, entry 12)

Abundance

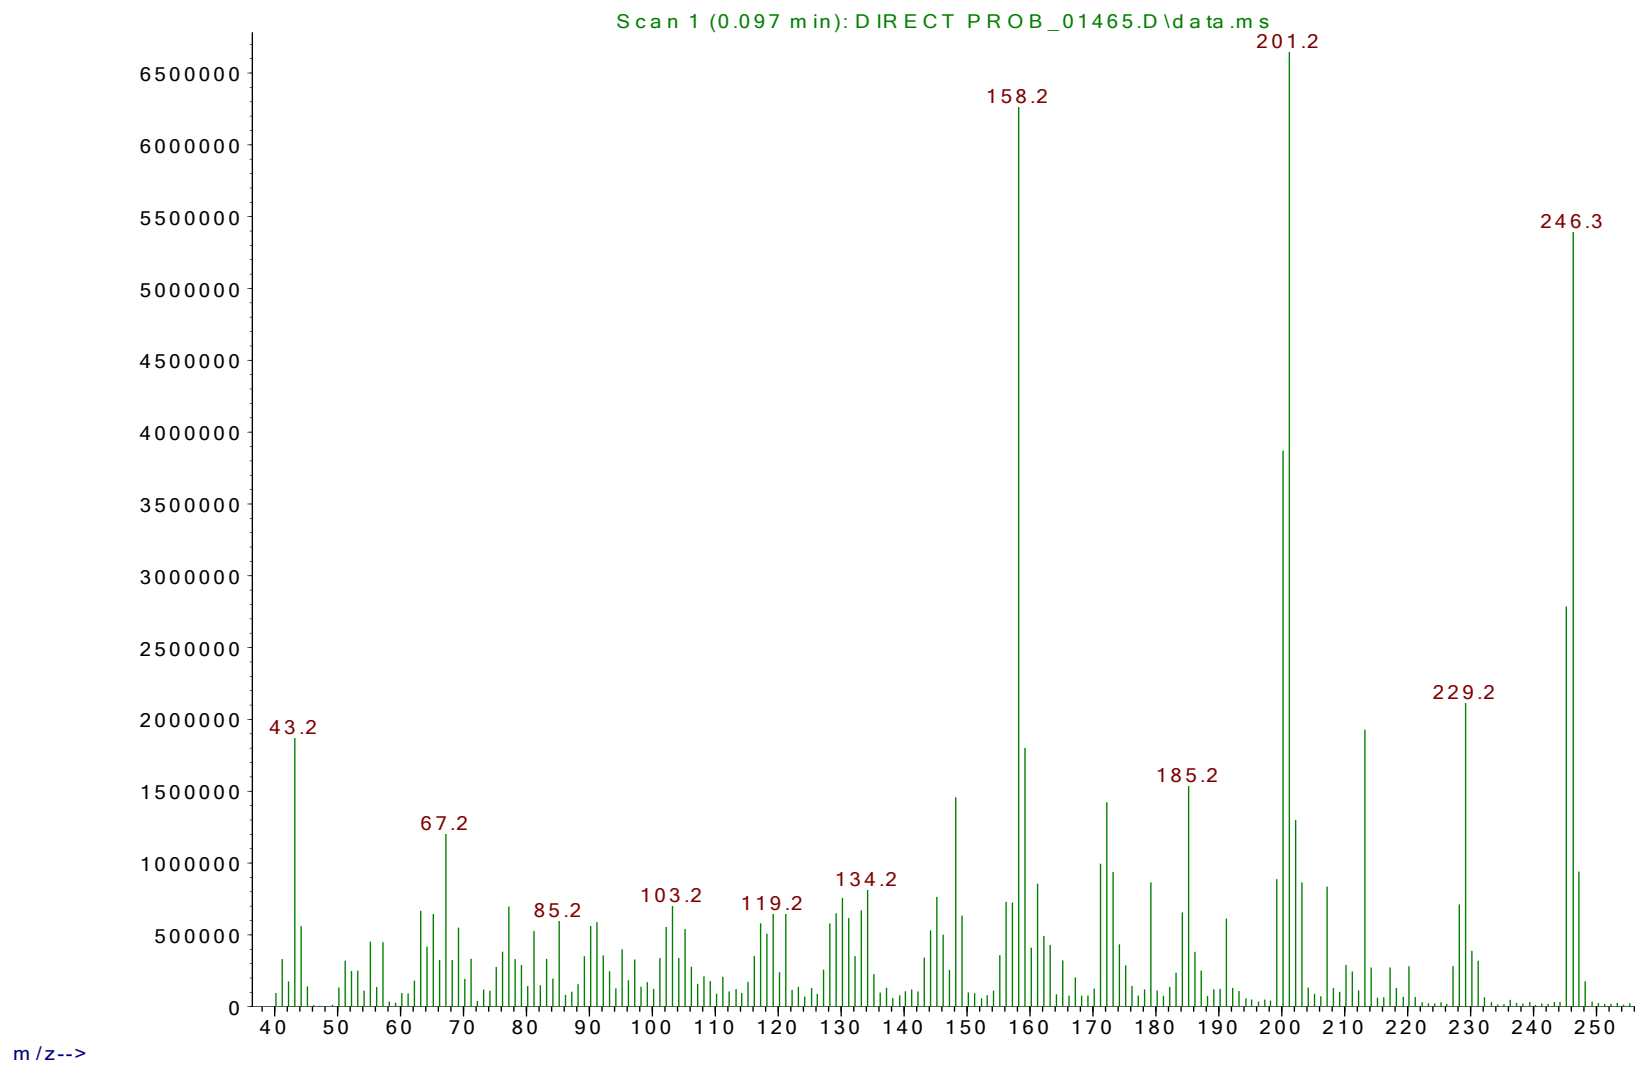

**Fig S26.** The Mass spectra of 5-amino-3-(furan-2-yl)-1-phenyl-1H-pyrazole-4-carbonitrile: (Table 3, entry 12)

Analyst  
Date

Azam Ranjbaran  
Monday, February 15, 2016 11:46 AM

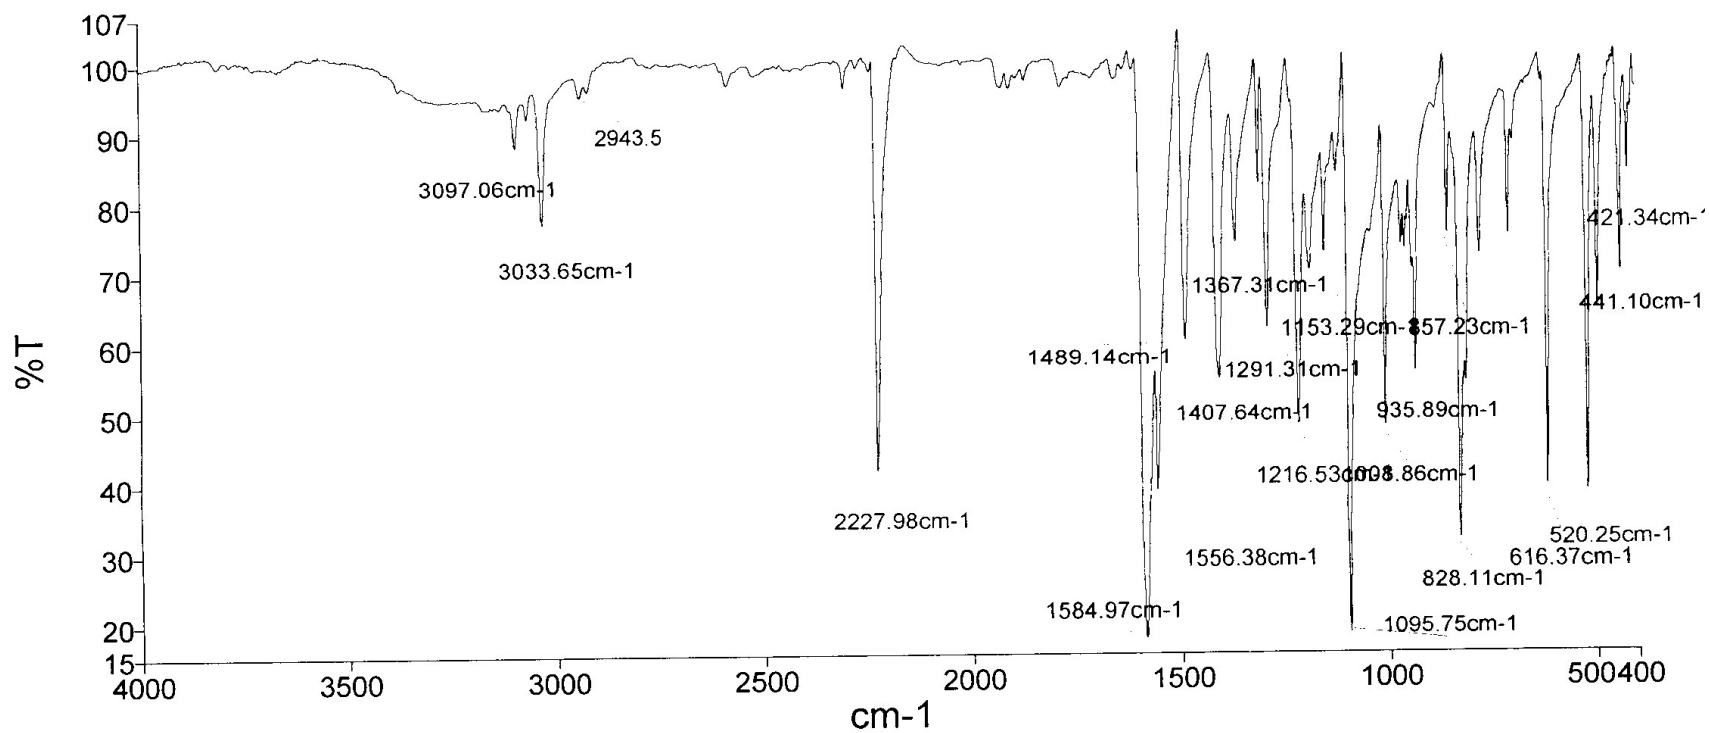

*Fig S27. The IR of 5-amino-1-phenyl-3-(thiophen-2-yl)-1H-pyrazole-4-carbonitrile: (Table 3, entry 13)*

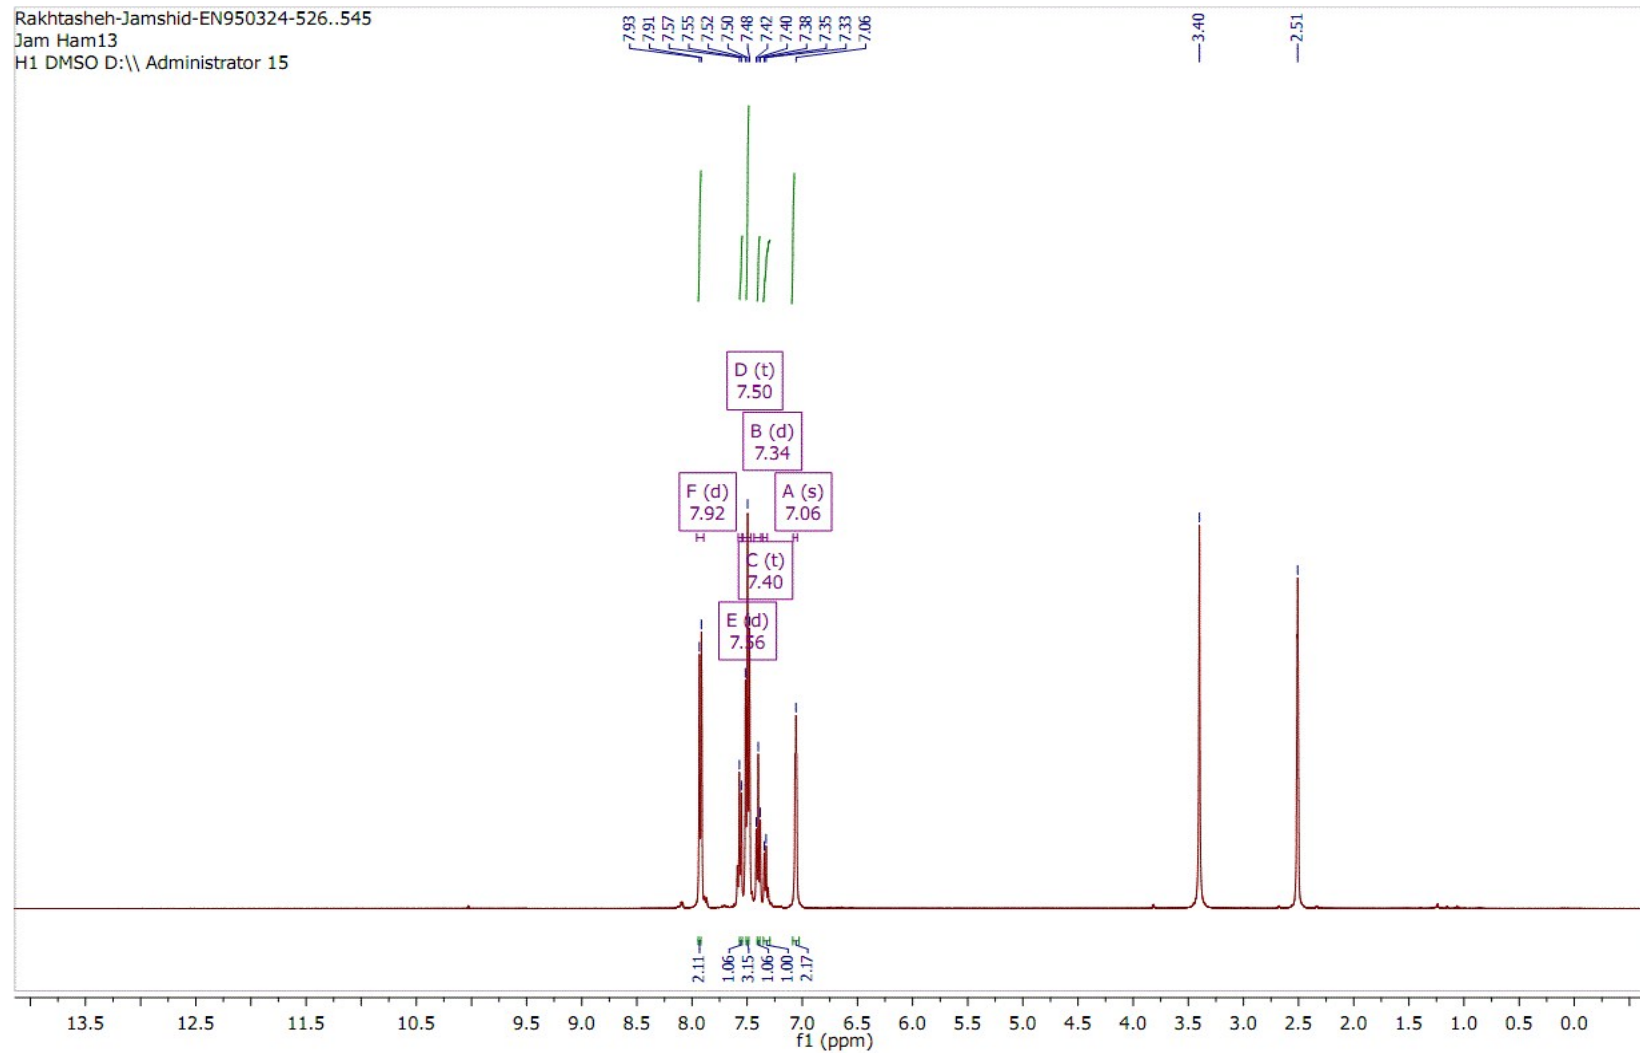

**Fig S28.** The  $^1\text{H}$  NMR of 5-amino-1-phenyl-3-(thiophen-2-yl)-1H-pyrazole-4-carbonitrile : ( Table 3, entry 13)

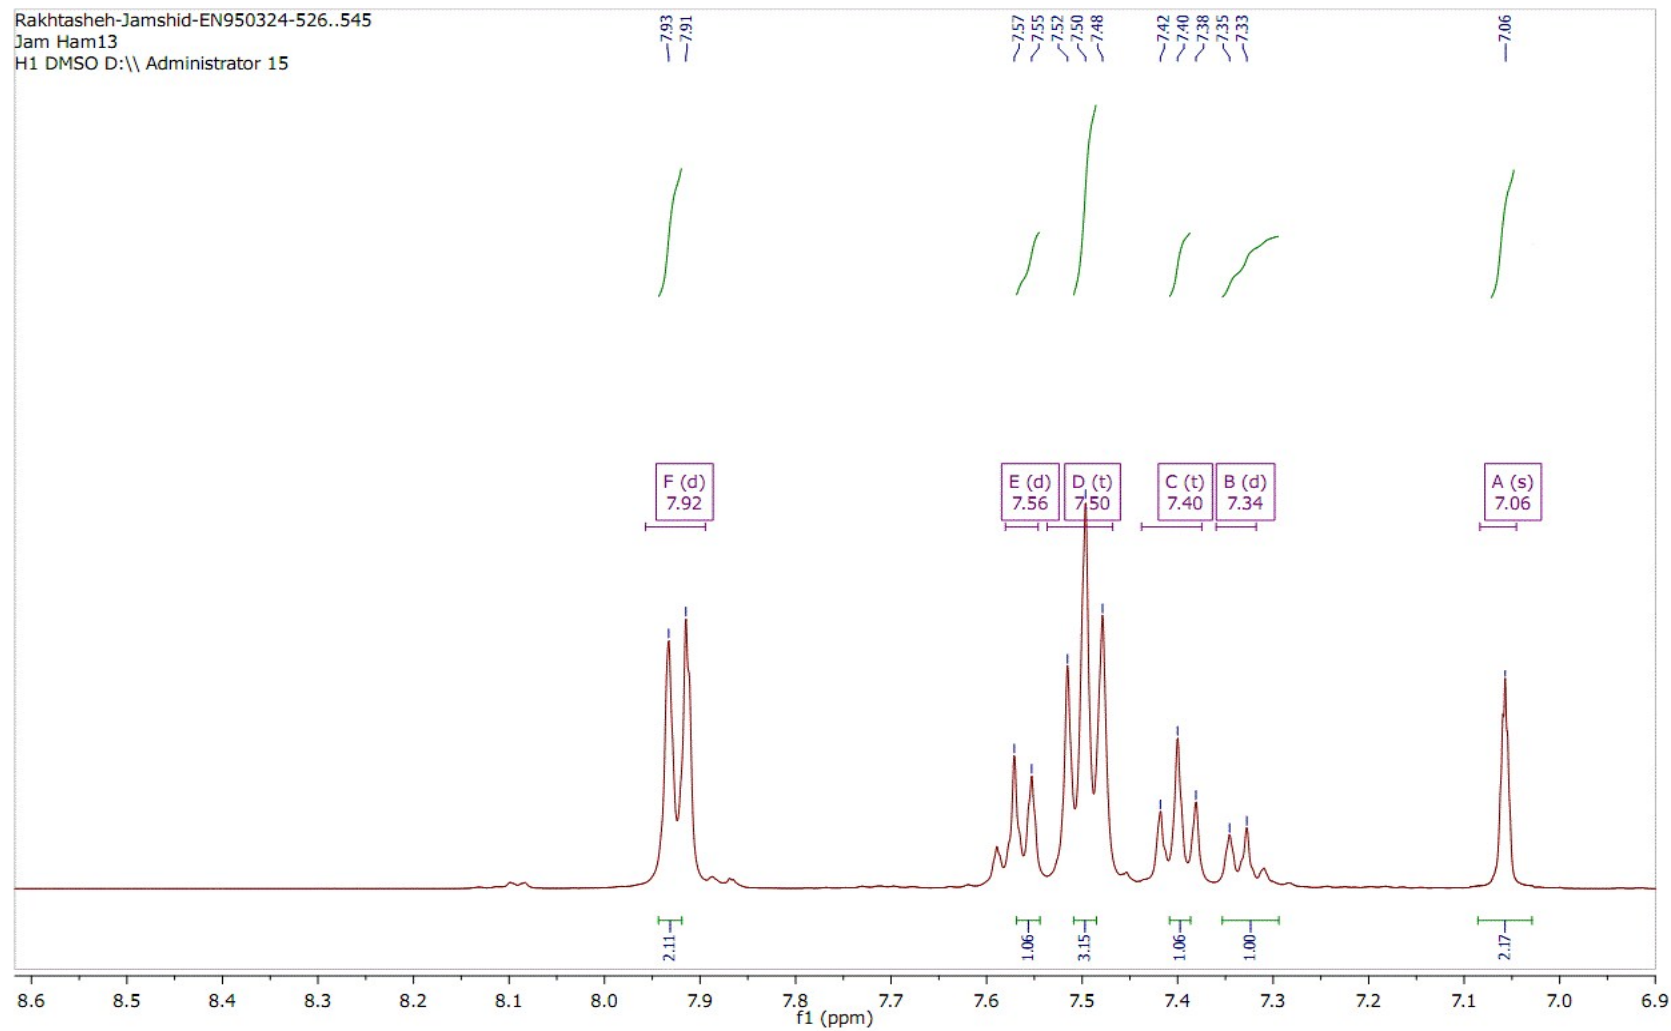

**Fig S29.** The expanded  $^1\text{H}$  NMR of 5-amino-1-phenyl-3-(thiophen-2-yl)-1H-pyrazole-4-carbonitrile : ( Table 3, entry 13)

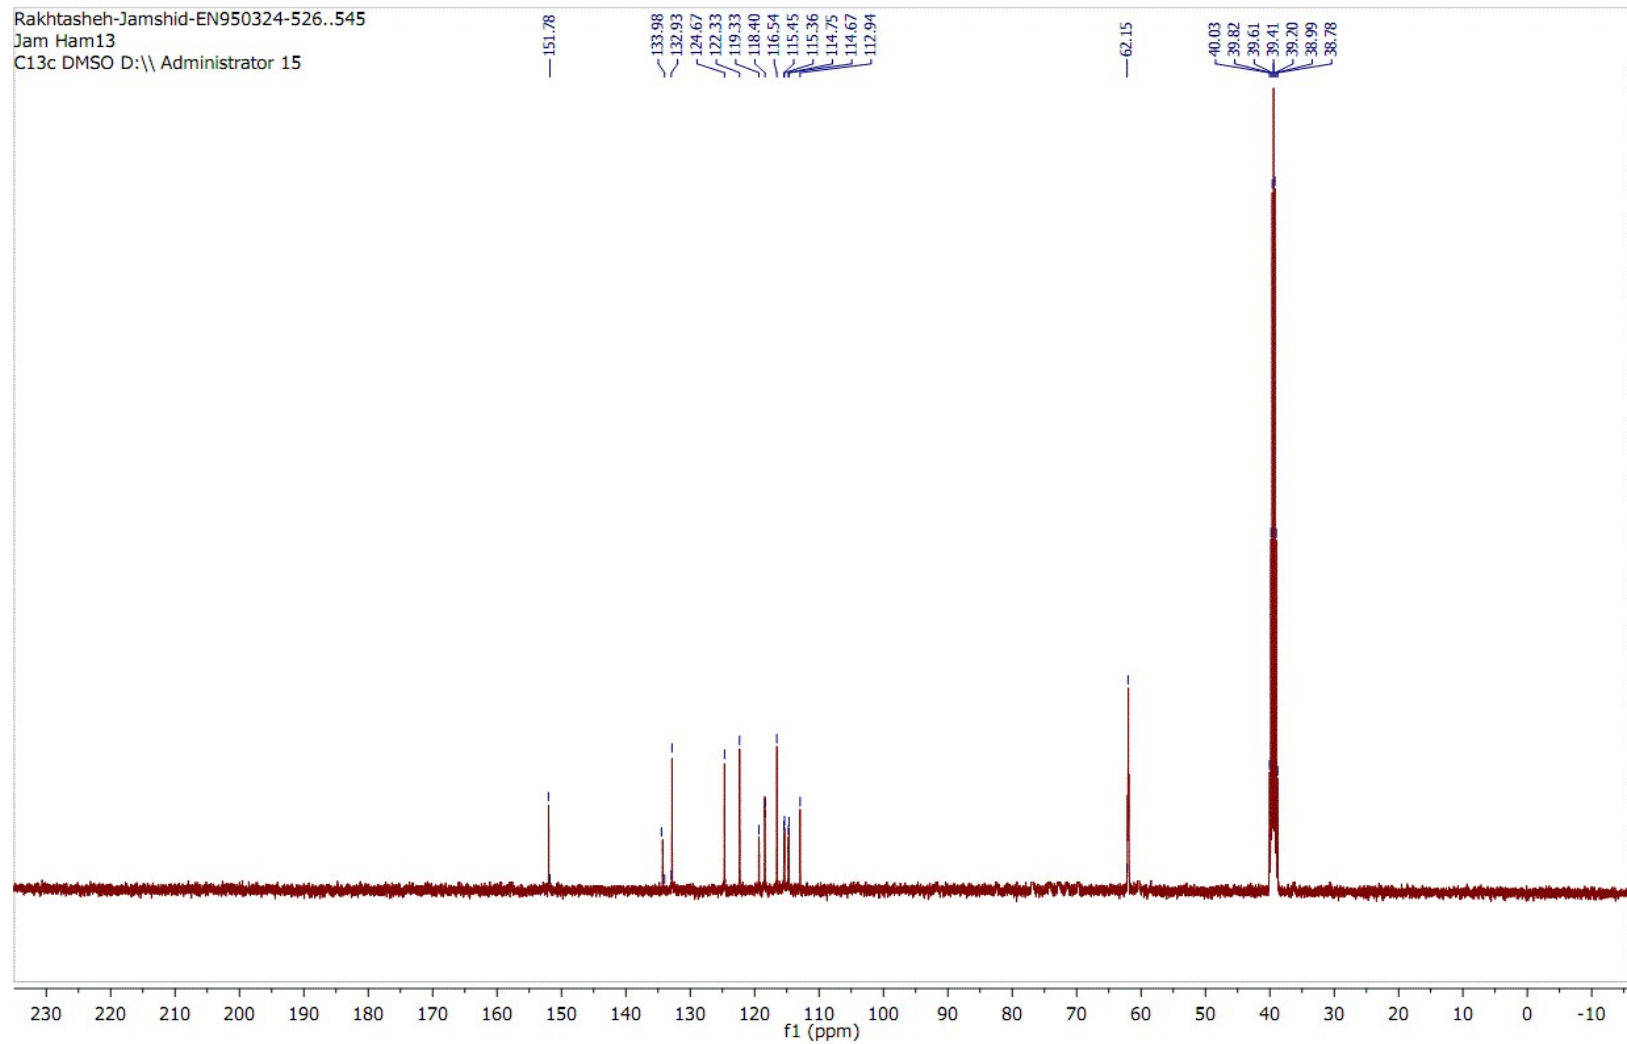

**Fig S30.** The  $^{13}\text{C}$  NMR of 5-amino-1-phenyl-3-(thiophen-2-yl)-1H-pyrazole-4-carbonitrile : ( Table 3, entry 13)

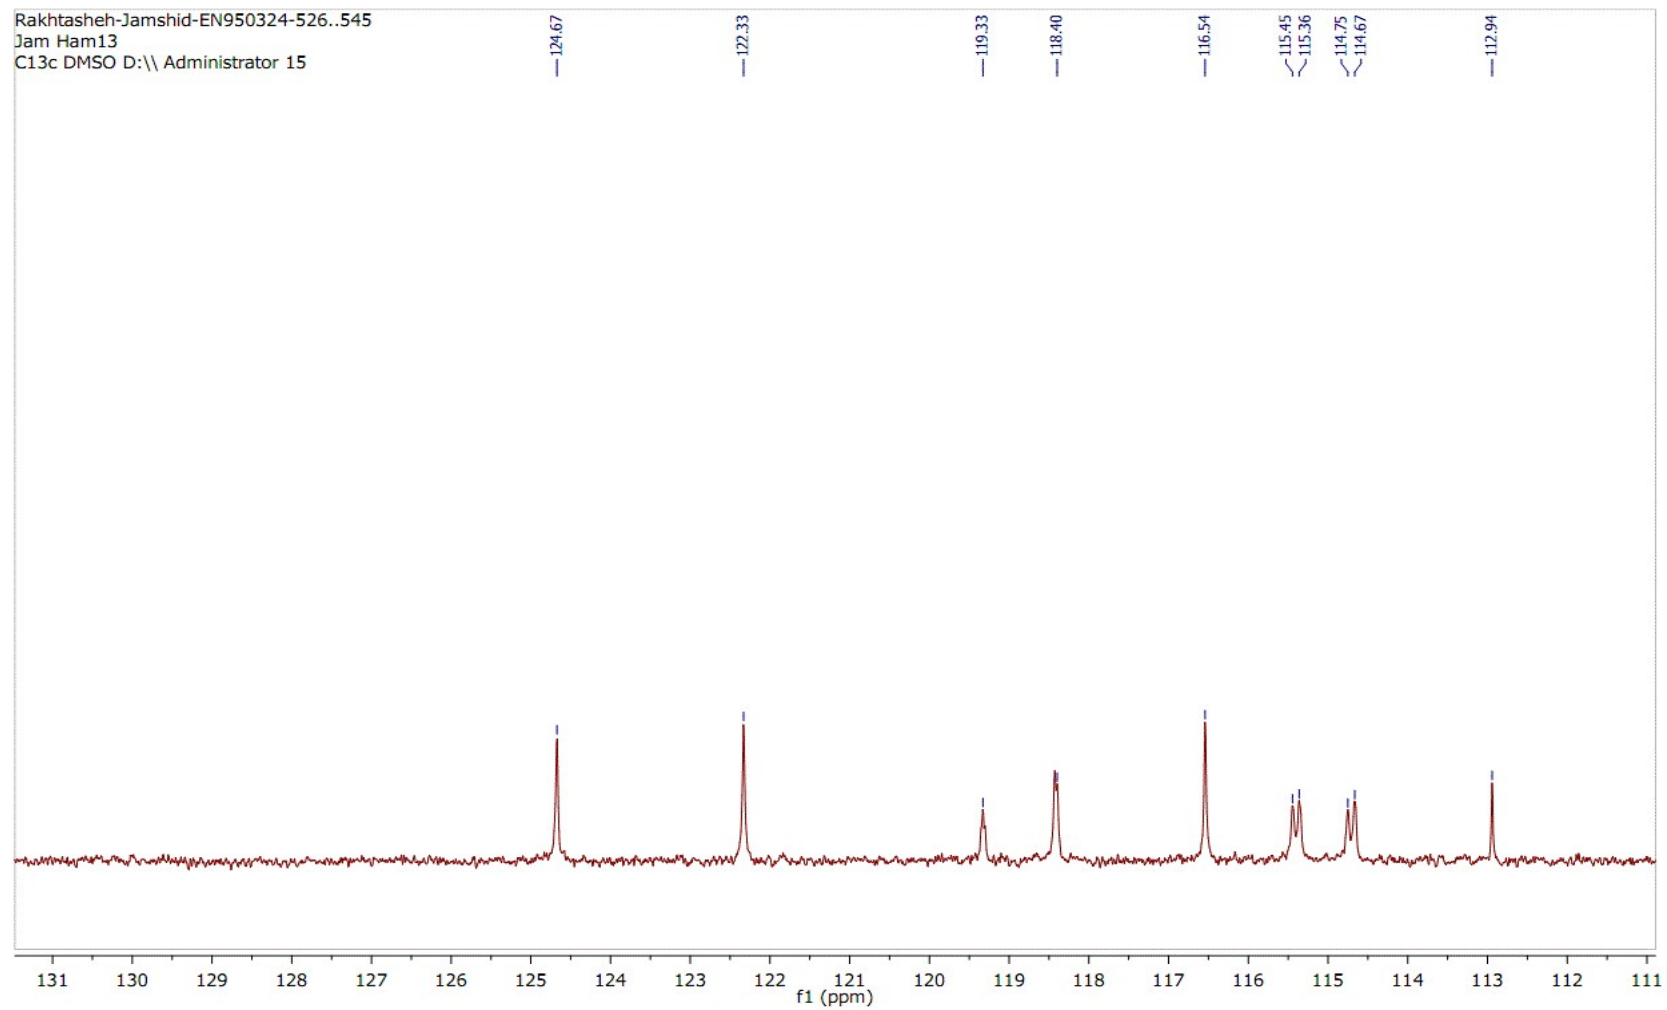

**Fig S31.** The expanded  $^{13}\text{C}$  NMR of 5-amino-1-phenyl-3-(thiophen-2-yl)-1H-pyrazole-4-carbonitrile : ( Table 3, entry 13)



Abundance

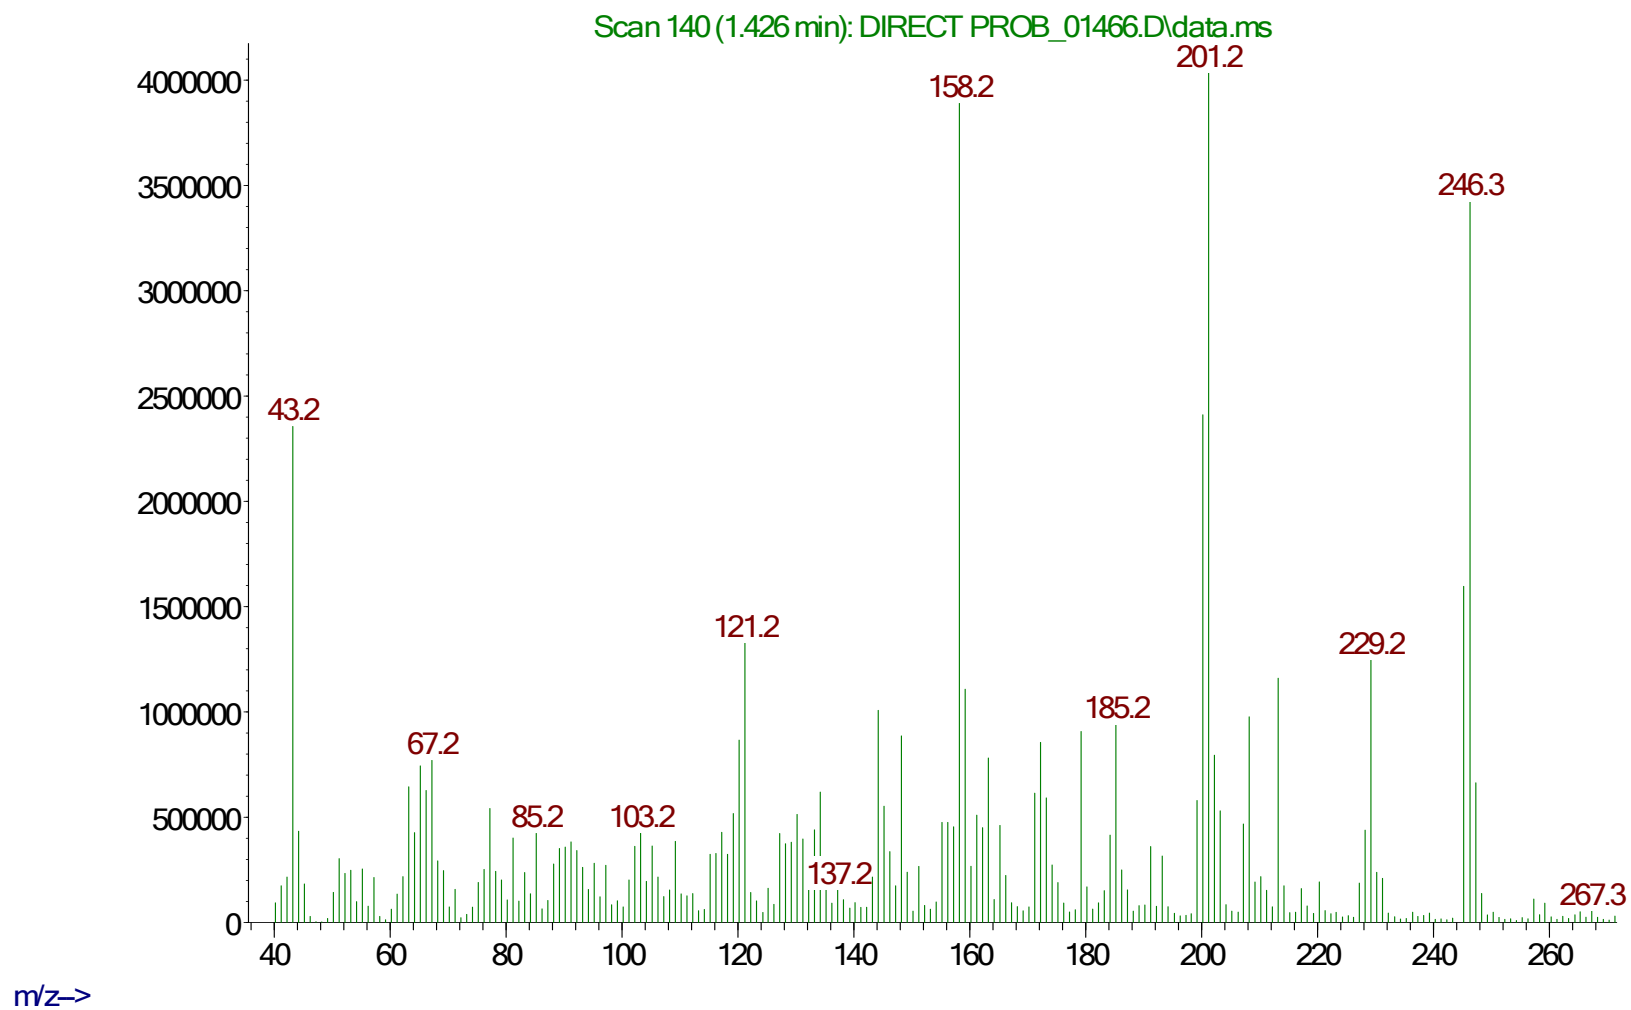

**Fig S32.** The Mass spectra of 5-amino-1-phenyl-3-(thiophen-2-yl)-1H-pyrazole-4-carbonitrile :( Table 3, entry 13)

**Table 3.** The three-component synthesis of 5-amino-pyrazole-4-carbonitrile derivatives in the presence of 0.02 g of nano catalyst.<sup>a</sup>

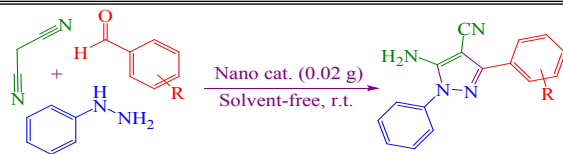

| Entry | Product | Time (min) | Yield <sup>b</sup> (%) | M.p (°C) [Lit.] <sup>Ref.</sup> |
|-------|---------|------------|------------------------|---------------------------------|
| 1     |         | 10         | 95                     | 175-177 (Yellow) <sup>30</sup>  |
| 2     |         | 15         | 93                     | 221-223 (White) <sup>30</sup>   |
| 3     |         | 15         | 92                     | 163-165 (Yellow) <sup>30</sup>  |
| 4     |         | 25         | 88                     | 235-237 (Orange) <sup>30</sup>  |
| 5     |         | 10         | 94                     | 158-160 (Orange)                |
| 6     |         | 25         | 88                     | >300 (Violet)                   |
| 7     |         | 20         | 90                     | 161-163 (Brown)                 |

|    |                                                                                     |    |    |                                |
|----|-------------------------------------------------------------------------------------|----|----|--------------------------------|
| 8  | 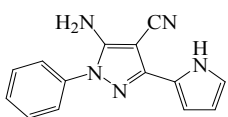   | 25 | 88 | 260-262 (Brown)                |
| 9  |    | 20 | 89 | 284-286 (Orange) <sup>30</sup> |
| 10 |    | 20 | 90 | 225-227 (Orange) <sup>30</sup> |
| 11 |    | 25 | 89 | 218-220 (Brown) <sup>43</sup>  |
| 12 |    | 25 | 87 | 168-170 (Brown)                |
| 13 |    | 25 | 87 | 163-165 (Brown)                |
| 14 |  | 20 | 90 | 112-114 (Red) <sup>43</sup>    |
| 15 |  | 20 | 90 | 125-127 (Orange) <sup>43</sup> |
| 16 |  | 30 | 85 | 180-182 (Brown) <sup>45</sup>  |

|    |                                                                                   |    |    |                    |
|----|-----------------------------------------------------------------------------------|----|----|--------------------|
| 17 | 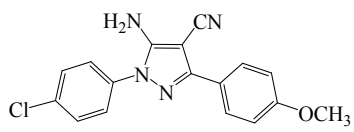 | 25 | 85 | 210-212 (Orange)45 |
| 18 |  | 25 | 88 | 158-160 (Brown)44  |

---

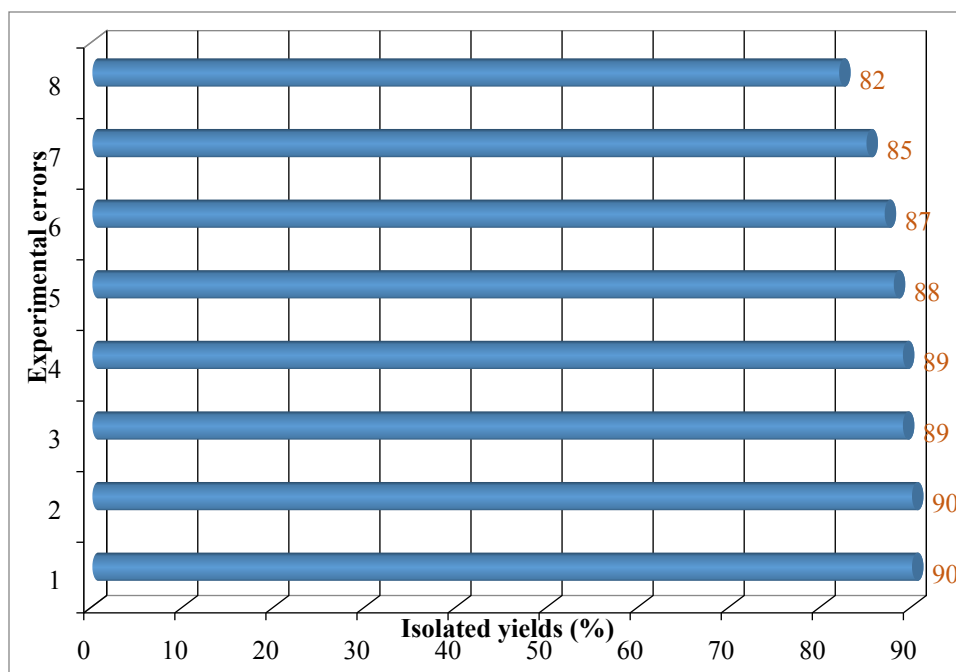

**Fig S33.** Reusability of  $Fe_3O_4@Si@MoO_2$  as a heterogeneous catalyst in 20 minutes.
